# Supplementary material
Source: Research Square preprint supplement (doi:10.21203/rs.3.rs-7961411/v1)
Supplement: Supplementary file 1 [file c029a559ab496990054ffb56.xlsx]

## Sheet: Classes
System	Class	ID range
Alley cropping	1	1 - 50
Hedgerows	2	51 - 100
Scattered AF	3	101-150
Orchards	4	151-200
Croplands without trees	5	201- 250
Natural trees	6	251- 300

## Sheet: Orchards
Id	ID	Country	Year of publication	Y	X	Geocoordinates	Reference
1	151	Senegal	2018	14.828055	-17.096666	Exact	https://doi.org/10.3390/rs10121900
2	152	Senegal	2018	14.983611	-17.003889	Exact	https://doi.org/10.3390/rs10121900
3	153	Senegal	2018	14.994166	-16.990278	Exact	https://doi.org/10.3390/rs10121900
4	154	Senegal	2018	14.826335	-17.10166	Exact	https://doi.org/10.3390/rs10121900
5	155	Senegal	2018	14.798056	-17.142221	Exact	https://doi.org/10.3390/rs10121900
6	156	Senegal	2018	14.790303	-17.228687	Exact	https://doi.org/10.3390/rs10121900
7	157	Senegal	2018	14.804289	-17.209672	Exact	https://doi.org/10.3390/rs10121900
8	158	Senegal	2018	14.77333	-17.108612	Exact	https://doi.org/10.3390/rs10121900
9	159	South Africa	2021	-32.94867775558334	19.208296159493095	Exact	https://doi.org/10.1016/j.agwat.2020.106627
10	160	South Africa	2021	-33.366657683051734	19.32420703257895	Exact	https://doi.org/10.1016/j.agwat.2020.106627
11	161	South Africa	2021	-34.06848898575076	19.112423401638708	Exact	https://doi.org/10.1016/j.agwat.2020.106627
12	162	Senegal	2018	14.788752	-17.227163	Exact	https://doi.org/10.3390/rs10121900
13	163	Senegal	2018	14.790277	-17.205	Exact	https://doi.org/10.3390/rs10121900
14	164	Portugal	2022	41.358612	-7.039444	Exact	https://doi.org/10.3390/w14244081
15	165	Spain	2021	37.510708	-5.962494	Exact	https://doi.org/10.3390/agronomy11071419
16	166	Australia	2016	-36.422167	145.458899	Exact	https://doi.org/10.17660/ActaHortic.2016.1130.86
17	167	Australia	2016	-42.996077	147.056947	Exact	https://doi.org/10.17660/ActaHortic.2016.1130.86
18	168	Pakistan	2018	32.02140524767173	73.04407177089517	Exact	http://dx.doi.org/10.33440/j.ijpaa.20180101.0001
19	169	Brazil	2021	-15.066675	-43.800009	Exact	http://doi.org/10.1590/1678-992X-2021-0052
20	170	Brazil	2020	-22.623802	-49.678967	Exact	https://doi.org/10.1007/s11119-020-09777-5
21	171	Spain	2022	41.443531	-4.898066	Exact	https://doi.org/10.3390/data7110157
22	172	China	2022	23.498597	114.468379	Exact	https://doi.org/10.3390/rs14225806
23	173	Spain	2017	38.112377	-3.16324	Exact	https://doi.org/10.1007/s11119-017-9502-0
24	174	Nigeria	2022	8.95360578762234	7.693436743274174	Exact	http://dx.doi.org/10.30564/re.v4i1.4190
25	175	USA	2021	40.70779029267635	-77.95410441193017	Exact	https://doi.org/10.3390/rs13020273
26	176	Algeria	2020	36.46961021406719	7.528619953153321	Exact	https://doi.org/10.1080/03235408.2024.2375042
27	177	Mexico	2017	29.183775380431367	-107.4206235328462	Exact	https://doi.org/10.18781/r.mex.fit.1704-3
28	178	Italy	2020	37.91815	15.981421	Exact	https://doi.org/10.1016/j.compag.2020.105500
29	179	Spain	2021	41.668274	0.457841	Exact	https://doi.org/10.3390/agronomy12010102
30	180	USA	2020	35.4981644449096	-119.660849047785	Exact	https://doi.org/10.1016/j.scitotenv.2020.137889
31	181	Spain	2024	41.6684965888115	0.456689428394522	Exact	https://doi.org/10.1016/j.eja.2024.127278
32	182	Kazakhstan	2023	42.5159729128231	70.4928210860305	Exact	http://dx.doi.org/10.51886/1999-740X_2023_2_67
33	183	Italy	2021	43.5487720953597	13.3646199004946	Exact	http://dx.doi.org/10.3390/su13158266
34	184	Portugal	2021	37.913055	-7.953195	Exact	http://dx.doi.org/10.3390/agronomy11081658
35	185	Spain	2024	41.5088993001528	0.8532220897562127	Exact	https://doi.org/10.1016/j.scienta.2024.113335
36	186	Israel	2021	32.984379	35.565368	Exact	https://doi.org/10.1111/jen.12860
37	187	Israel	2021	33.026064	35.582158	Estimated	https://doi.org/10.1111/jen.12860
38	188	Israel	2021	32.7798733328526	35.7569877158322	Estimated	https://doi.org/10.1111/jen.12860
39	189	Israel	2021	32.854476	35.698701	Estimated	https://doi.org/10.1111/jen.12860
40	190	Saudi Arabia	2024	24.416824	46.574928	Exact	https://doi.org/10.1016/j.jksus.2024.103268
41	191	Chile	2024	-40.882903494475	-72.8374678302501	Exact	https://doi.org/10.3390/plants13162257
42	192	Irak	2024	33.714034	44.635779	Exact	http://dx.doi.org/10.1088/1755-1315/1371/8/082048
43	193	Irak	2024	33.764133	44.634036	Exact	http://dx.doi.org/10.1088/1755-1315/1371/8/082048
44	194	Indonesia	2023	-7.789276	112.530396	Estimated	https://doi.org/10.1080/09583157.2024.2383290
45	195	Japan	2017	32.9500011038224	129.959998248829	Exact	http://dx.doi.org/10.2480/agrmet.D-16-00006
46	196	Japan	2023	43.1512136558088	141.96580362202	Exact	https://doi.org/10.20944/preprints202303.0507.v1
47	197	India	2017	23.2795369004329	85.4105470600493	Exact	https://doi.org/10.1007/s10457-016-9957-4
48	198	Australia	2016	-25.0962926548053	152.334424894043	Exact	https://doi.org/10.1371/journal.pone.0150159
49	199	Australia	2017	-25.1227476047307	152.123621893362	Exact	https://doi.org/10.3390/rs9121223
50	200	Lebanon	2023	33.4031045294392	35.6547929396586		https://doi.org/10.3390/app132212326

## Sheet: Croplands_WT
Id	Y	X	Reference
201	51.0092333622998	6.31251072725553	https://doi.org/10.1111/gcb.14492
202	43.02673539948	-95.0380002411782	https://doi.org/10.1111/gcb.14492
203	49.6440055781392	33.5035794103495	https://doi.org/10.1111/gcb.14492
204	50.0089502480585	27.2453879537744	https://doi.org/10.1111/gcb.14492
205	41.8600346625196	-96.6207697547647	https://doi.org/10.1111/gcb.14492
206	53.5507484852754	-109.069944726948	https://doi.org/10.1111/gcb.14492
207	17.459229569448	103.137379111002	https://doi.org/10.1111/gcb.14492
208	-41.8650950055731	147.054234315551	https://doi.org/10.1111/gcb.14492
209	52.2001250471091	61.9158925058726	https://doi.org/10.1111/gcb.14492
210	51.2277118478797	42.6525724980848	https://doi.org/10.1111/gcb.14492
211	-43.2065216316647	172.69534536665	https://doi.org/10.1111/gcb.14492
212	-31.4406609891585	-52.8542309515209	https://doi.org/10.1111/gcb.14492
213	41.8842640351293	-5.33734161526936	https://doi.org/10.1111/gcb.14492
214	17.3012288727539	81.0791556022562	https://doi.org/10.1111/gcb.14492
215	42.0671227826636	-79.2710478785349	https://doi.org/10.1111/gcb.14492
216	-32.9655631720742	-63.2626884845132	https://doi.org/10.1111/gcb.14492
217	51.2658896134419	35.0584054535383	https://doi.org/10.1111/gcb.14492
218	-37.0889363032622	-59.2799511226309	https://doi.org/10.1111/gcb.14492
219	19.1762336046661	-70.1042025255842	https://doi.org/10.1111/gcb.14492
220	-34.6734838324052	138.620349329075	https://doi.org/10.1111/gcb.14492
221	-30.5211078608582	116.960034494869	https://doi.org/10.1111/gcb.14492
222	15.9011726827518	105.12056649173	https://doi.org/10.1111/gcb.14492
223	-40.1155553582133	175.362461435698	https://doi.org/10.1111/gcb.14492
224	47.2426899234225	-0.0458355421625186	https://doi.org/10.1111/gcb.14492
225	45.8340509098807	0.0958312716421858	https://doi.org/10.1111/gcb.14492
226	43.3432081424584	0.10386629080584	https://doi.org/10.1111/gcb.14492
227	36.2177022216284	5.78748043103657	https://doi.org/10.1111/gcb.14492
228	37.6177023033246	-5.80411110593954	https://doi.org/10.1111/gcb.14492
229	44.5760023768834	5.829094855088	https://doi.org/10.1111/gcb.14492
230	26.4522486945767	77.7499531946969	https://doi.org/10.1038/sdata.2017.136
231	13.9523966778338	107.249996179895	https://doi.org/10.1038/sdata.2017.136
232	49.4534344652502	117.25029574428	https://doi.org/10.1038/sdata.2017.136
233	20.6518864067181	77.5506940007883	https://doi.org/10.1038/sdata.2017.136
234	45.4521509296132	11.749964119154	https://doi.org/10.1038/sdata.2017.136
235	-30.0476238189097	-51.7500094164733	https://doi.org/10.1038/sdata.2017.136
236	32.9530651846701	-110.749957086671	https://doi.org/10.1038/sdata.2017.136
237	39.4522705811589	118.250042166742	https://doi.org/10.1038/sdata.2017.136
238	53.2499574074016	5.95237944969087	https://doi.org/10.1038/sdata.2017.136
239	44.4525188256091	19.9524881866264	https://doi.org/10.1038/sdata.2017.136
240	54.4523525742887	30.7501017094844	https://doi.org/10.1038/sdata.2017.136
241	54.4516574951856	74.7487499108088	https://doi.org/10.1038/sdata.2017.136
242	-27.7510241352835	26.4514732916214	https://doi.org/10.1038/sdata.2017.136
243	-27.8482028233127	25.9523529432793	https://doi.org/10.1038/sdata.2017.136
244	33.250147500528	-7.348143933848496	https://doi.org/10.1038/sdata.2017.136
245	11.9524148873762	-15.2501476483312	https://doi.org/10.1038/sdata.2017.136
246	38.651819486776	27.95232735394	https://doi.org/10.1038/sdata.2017.136
247	32.4529966026438	20.7505793550973	https://doi.org/10.1038/sdata.2017.136
248	31.2500097862897	30.9523785034499	https://doi.org/10.1038/sdata.2017.136
249	35.4526169438587	36.2499034385215	https://doi.org/10.1038/sdata.2017.136
250	27.9525326108597	68.750053642064	https://doi.org/10.1038/sdata.2017.136

## Sheet: Alleycropping
ID	System	Country	Year of publication	Y	X	Coordinates	Reference
1	Alley cropping	Egypte	2023	26.093292455014577	32.479788106150046	Exact	https://doi.org/10.3390/agriculture13010149
2	Alley cropping	Rwanda	2023	-1.5627291139987962	29.371616764577784	Exact	https://doi.org/10.1007/s10457-023-00904-5
3	Alley cropping	Tunisia	2024	36.7086691700405	9.509848011078669	Exact	https://doi.org/10.3390/su16135329
4	Alley cropping	Malaysia	2018	2.787286740071601	102.9223379147263	Exact	https://doi.org/10.1016/j.agee.2018.03.017
5	Alley cropping	Hungary	2018	46.681164	19.550394	Exact	https://www.cabidigitallibrary.org/doi/10.5555/20183344581
6	Alley cropping	France	2021	43.704166	3.861389	Exact	https://doi.org/10.1016/j.ejsobi.2021.103330
7	Alley cropping	USA	2020	36.09103272806777	-94.19001395311489	Exact	https://doi.org/10.1080/01904167.2020.1783303
8	Alley cropping	Malaysia	2019	2.7779644062299687	102.91932864685018	Exact	https://doi.org/10.1016/j.agrformet.2019.107632
9	Alley cropping	Hungary	2023	47.590389	19.331944	Exact	https://doi.org/10.3390/plants12030595
10	Alley cropping	spain	2023	37.958611	-0.938056	Exact	https://doi.org/10.1016/j.eja.2022.126684
11	Alley cropping	Greece	2020	37.992146	23.783314	Exact	https://doi.org/10.1007/s11270-020-04590-2
12	Alley cropping	Italy	2020	43.68227994265581	10.341805567386645	Exact	https://doi.org/10.3390/agronomy10010052
13	Alley cropping	France	2017	46.010834	-0.2325	Exact	https://doi.org/10.1016/j.agee.2016.12.011
14	Alley cropping	France	2017	46.198334	-0.176944	Exact	https://doi.org/10.1016/j.agee.2016.12.011
15	Alley cropping	France	2017	48.102222	1.299444	Exact	https://doi.org/10.1016/j.agee.2016.12.011
16	Alley cropping	Germany	2021	51.78960040466635	14.632735333218283	Exact	https://doi.org/10.3390/rs13142751
17	Alley cropping	Germany	2021	51.0131356713273	11.644496581070358	Exact	https://doi.org/10.3390/rs13142751
18	Alley cropping	Croatia	2022	45.30656281218369	18.439042708798166		https://doi.org/10.3390/agronomy13010077
19	Alley cropping	India	2021	23.272148	85.347221	Exact	https://doi.org/10.17660/th2021/76.2.2
20	Alley cropping	France	2022	43.61218401296337	3.9765024568908256	Exact	https://doi.org/10.1007/s11104-022-05714-9
21	Alley cropping	Italy	2021	43.67544249713808	10.92313257621417	Exact	https://doi.org/10.3390/f12091251
22	Alley cropping	Turkey	2022	38.4648	38.3586	Exact	https://doi.org/10.47115/bsagriculture.1056280
23	Alley cropping	Canada	2017	46.338490	-73.183829	Exact	http://dx.doi.org/10.1139/CJSS-2016-0115
24	Alley cropping	Canada	2017	46.451731	-72.990249	Exact	http://dx.doi.org/10.1139/CJSS-2016-0115
25	Alley cropping	Brazil	2017	-20.9164531809137	-44.8538677139821	Exact	https://coffeescience.ufla.br/index.php/Coffeescience/article/view/1429
26	Alley cropping	Côte d’Ivoire	2023	5.273170	-3.831467	Exact	https://doi.org/10.4236/as.2023.1410092
27	Alley cropping	Democratic Republic of Congo	2019	-2.33403117524533	28.7884720702837	Exact	https://doi.org/10.1016/j.eja.2019.125923
28	Alley cropping	Uganda	2021	1.180657	34.299416	Exact	https://doi.org/10.1017/S0014479720000411
29	Alley cropping	Italy	2017	45.14211852330132	11.503775721077291	Exact	Lessons learnt:Trees for timber with arable crops in Italy
30	Alley cropping	Greece	2016	40.111084090438595	23.342216676316202	Exact	https://link.springer.com/article/10.1007/s10457-021-00618-6
31	Alley cropping	China	2019	36.107022	110.593902	Exact	https://doi.org/10.3390/agronomy9010034
32	Alley cropping	Morocco	2023	34.051821186419204	-5.087481105790628	Exact	https://doi.org/10.1016/j.sjbs.2023.103597
33	Alley cropping	Italy	2021	42.54193046547715	11.444650548117998	Exact	https://doi.org/10.3390/f12020233*
34	Alley cropping	Malaysia	2017	3.397500046352276	101.2063047720452	Exact	https://doi.org/10.1080/01584197.2019.1621680
35	Alley cropping	Greece	2022	38.349980	22.200035	Exact	https://doi.org/10.3390/f13010128
36	Alley cropping	Morocco	2024	35.010834	-2.406389	Exact	https://doi.org/10.3390/agronomy14030495
37	Alley cropping	Morocco	2024	34.966255	-2.502569	Exact	https://doi.org/10.3390/agronomy14030495
38	Alley cropping	Morocco	2021	33.895583	-4.673943	Exact	https://doi.org/10.1016/j.agee.2020.107234
39	Alley cropping	Morocco	2023	33.9302927332058	-5.27464831864597	Exact	http://doi.org/10.26480/mjsa.01.2023.06.13
40	Alley cropping	Tunisia	2022	36.632269	10.279716	Exact	https://doi.org/10.1080/00103624.2022.2072863
41	Alley cropping	Greece	2022	37.90844814784964	23.83395797834276	Exact	https://doi.org/10.3390/agronomy12102579
42	Alley cropping	Morocco	2022	33.953213	-5.531949	Exact	https://doi.org/10.3389/fmicb.2022.977797
43	Alley cropping	Brazil	2023	-2.348333	-48.262222	Exact	https://doi.org/10.1007/s10457-023-00832-4
44	Alley cropping	Indonesia	2021	-1.941329	103.251968	Exact	https://doi.org/10.1016/j.dib.2021.107615
45	Alley cropping	Mexico	2024	19.022005028170632	-102.26426151114724	Exact	http://dx.doi.org/10.3958/059.049.0132
46	Alley cropping	Switzerland	2022	47.346416	8.761666	Exact	https://doi.org/10.1007/s10457-022-00740-z
47	Alley cropping	Ghana	2022	5.05832252388531	-2.49706891611228	Exact	http://dx.doi.org/10.24451/arbor.20126
48	Alley cropping	Italy	2016	42.809592	12.661176	Exact	AGFORWARD (613520) : Intercropping of Olive Orchards in Italy
49	Alley cropping	China	2020	19.5486087254347	109.47496931451	Exact	https://doi.org/10.1016/j.jclepro.2020.121493
50	Alley cropping	China	2019	38.08440778212971	77.16651214623651	Exact	https://doi.org/10.1371/journal.pone.0203238

## Sheet: Hedgerows
Id	System	Country	Year of publication	Y	X	Coordinates	Reference
51	Hedgerows	Kenya	2022	0.186462	34.741375	Exact	https://doi.org/10.1016/j.agee.2022.108104
52	Hedgerows	Kenya	2022	0.435786	34.856698	Exact	https://doi.org/10.1016/j.agee.2022.108104
53	Hedgerows	South Africa	2022	-29.4511604393034	30.54222573267856	Exact	https://doi.org/10.1007/s10457-021-00701-y
54	Hedgerows	South Africa	2020	-33.807282	18.916987	Exact	https://doi.org/10.17221/616/2019-PSE
55	Hedgerows	Kenya	2017	-33.80759224518522	18.916998549105813	Exact	https://doi.org/10.1016/j.agsy.2017.04.008
56	Hedgerows	Belgium	2021	51.378865	4.938543	Estimated	https://doi.org/10.1007/s10457-021-00634-6
57	Hedgerows	UK	2020	51.68348626659701	-1.8993562729494038	Exact	https://doi.org/10.1016/j.agee.2017.08.008
58	Hedgerows	Germany	2024	51.49282026888746	9.9098317806673	Exact	https://doi.org/10.1016/j.jenvman.2023.119498
59	Hedgerows	Belgium	2020	50.92851187199253	3.74146926864259	Exact	https://doi.org/10.1111/1365-2664.13620
60	Hedgerows	Belgium	2020	50.914074427459745	3.7565180347858673	Exact	https://doi.org/10.1111/1365-2664.13620
61	Hedgerows	Belgium	2020	50.977627868727055	3.7573715668778087	Exact	https://doi.org/10.1111/1365-2664.13620
62	Hedgerows	Belgium	2020	50.769630766711494	3.803457290523237	Exact	https://doi.org/10.1111/1365-2664.13620
63	Hedgerows	Germany	2020	53.18509	11.91086	Exact	https://doi.org/10.1111/1365-2664.13620
64	Hedgerows	Germany	2020	53.185855910581786	11.956317247221055	Exact	https://doi.org/10.1111/1365-2664.13620
65	Hedgerows	Germany	2020	53.18808	2854676	Exact	https://doi.org/10.1111/1365-2664.13620
66	Hedgerows	Germany	2020	53.19775545358287	11.907486441226828	Exact	https://doi.org/10.1111/1365-2664.13620
67	Hedgerows	Estonia	2020	58.52810955588557	26.888985717525262	Exact	https://doi.org/10.1111/1365-2664.13620
68	Hedgerows	Estonia	2020	58.5283	26.9537	Exact	https://doi.org/10.1111/1365-2664.13620
69	Hedgerows	Estonia	2020	58.6063	27.12124	Exact	https://doi.org/10.1111/1365-2664.13620
70	Hedgerows	France	2020	49.943525958815556	3.8388689961437517	Exact	https://doi.org/10.1111/1365-2664.13620
71	Hedgerows	France	2020	49.92882	3.83469	Exact	https://doi.org/10.1111/1365-2664.13620
72	Hedgerows	Norway	2020	63.37024609997477	10.085872333433707	Exact	https://doi.org/10.1111/1365-2664.13620
73	Hedgerows	Norway	2020	63.34641015699603	10.22642786769913	Exact	https://doi.org/10.1111/1365-2664.13620
74	Hedgerows	Norway	2020	63.498139180069515	9.798302890963093	Exact	https://doi.org/10.1111/1365-2664.13620
75	Hedgerows	Sweden	2020	55.767828482868985	13.607174581621063	Exact	https://doi.org/10.1111/1365-2664.13620
76	Hedgerows	Sweden	2020	55.782439420159	13.647891030628605	Exact	https://doi.org/10.1111/1365-2664.13620
77	Hedgerows	Sweden	2020	55.801733843529	13.605619524959149	Exact	https://doi.org/10.1111/1365-2664.13620
78	Hedgerows	Germany	2020	54.02643940862905	10.394076289951498	Exact	https://doi.org/10.1111/1365-2664.13620
79	Hedgerows	Germany	2020	54.00198783571939	10.437560905415348	Exact	https://doi.org/10.1111/1365-2664.13620
80	Hedgerows	Germany	2020	53.997042037211784	10.538243848195426	Exact	https://doi.org/10.1111/1365-2664.13620
81	Hedgerows	Germany	2020	53.97620292186878	10.531712929413086	Exact	https://doi.org/10.1111/1365-2664.13620
82	Hedgerows	South Africa	2016	-30.399438743001884	29.398361014304466	Exact	https://doi.org/10.1007/s10457-016-9951-x
83	Hedgerows	UK	2021	53.033459	-3.747871	Exact	https://doi.org/10.1016/j.geoderma.2020.114697
84	Hedgerows	UK	2021	53.037109	-3.712	Exact	https://doi.org/10.1016/j.geoderma.2020.114697
85	Hedgerows	Hungary	2024	47.395226	19.147882	Exact	http://dx.doi.org/10.11118/978-80-7509-982-2
86	Hedgerows	France	2023	47.98967494171678	-1.7676714261755315	Exact	http://dx.doi.org/10.1016/j.ecolind.2023.110689
87	Hedgerows	India	2016	18.752739	82.7008	Exact	https://link.springer.com/article/10.1007/s10457-016-9958-3
88	Hedgerows	France	2021	48.13993357915797	-3.6133280002615207	Exact	https://doi.org/10.1016/j.agee.2020.107174
89	Hedgerows	France	2021	47.010551149722524	-0.7475334387811696	Exact	https://doi.org/10.1016/j.agee.2020.107174
90	Hedgerows	France (martinique)	2023	14.691082	-61.007736	Exact	http://dx.doi.org/10.1002/ps.7876
91	Hedgerows	France (martinique)	2023	14.657885	-60.918079	Exact	http://dx.doi.org/10.1002/ps.7876
92	Hedgerows	France (martinique)	2023	14.566732	-60.974873	Exact	http://dx.doi.org/10.1002/ps.7876
93	Hedgerows	France (martinique)	2023	14.720639	-60.995834	Exact	http://dx.doi.org/10.1002/ps.7876
94	Hedgerows	Hungary	2023	46.75735080370743	16.35524920883918	Exact	http://dx.doi.org/10.18690/agricsci.20.2.1
95	Hedgerows	Northern Ireland	2022	54.732922121167995	-5.854950610656353	Exact	https://doi.org/10.1007/s11295-022-01538-x
96	Hedgerows	Northern Ireland	2022	54.9523944675765	-5.96757343236372	Exact	https://doi.org/10.1007/s11295-022-01538-x
97	Hedgerows	Slovakia	2020	48.3902578764688	18.9812340620389	Exact	https://doi.org/10.1016/j.baae.2020.05.001
98	Hedgerows	India	2016	18.752813524518814	82.70098684675294	Exact	https://doi.org/10.1007/s10457-016-9958-3
99	Hedgerows	UK	2019	53.0400152299562	-3.70998434299617	Exact	https://doi.org/10.1111/sum.12517
100	Hedgerows	France	2023	47.995137	-1.765256	Exact	https://doi.org/10.1016/j.ecolind.2023.110689

## Sheet: ScatteredAF
Id	System	Country	Year of publication	Y	X	Coordinates	Reference
101	Silvopasture/ scattered	Senegal	2024	14.268847	-16.21689	Estimated	https://doi.org/10.1007/s43621-024-00208-3
102	Silvopasture/ scattered	Senegal	2024	14.787437	-16.63992	Estimated	https://doi.org/10.1007/s43621-024-00208-3
103	Silvopasture/ scattered	Senegal	2024	14.711522	-16.569209	Estimated	https://doi.org/10.1007/s43621-024-00208-3
104	Silvopasture/ scattered	Senegal	2024	13.772321	-15.993486	Estimated	https://doi.org/10.1007/s43621-024-00208-3
105	Silvopasture/ scattered	Senegal	2024	15.034711	-16.785583	Estimated	https://doi.org/10.1007/s43621-024-00208-3
106	Silvopasture/ scattered	Senegal	2024	14.46334811594152	-16.2984731164179	Estimated	https://doi.org/10.1007/s43621-024-00208-3
107	Silvopasture/ scattered	Senegal	2024	13.948215273679377	-16.0621789683836	Estimated	https://doi.org/10.1007/s43621-024-00208-93
108	Silvopasture/ scattered	Morocco	2019	31.995559	-6.519025	Estimated	https://doi.org/10.4000/rga.6524
109	Silvopasture/ scattered	Morocco	2019	32.050359	-6.568774	Estimated	https://doi.org/10.4000/rga.6524
110	Silvopasture/ scattered	Burkina Fasso	2024	12.683333	-1.566667	Exact	https://doi.org/10.1016/j.geodrs.2024.e00781
111	Silvopasture/ scattered	Burkina Fasso	2024	12.1	0.483333	Exact	https://doi.org/10.1016/j.geodrs.2024.e00781
112	Silvopasture/ scattered	Colombia	2020	8.510305	-76.103584	Exact	https://doi.org/10.1007/s10457-021-00698-4
113	Silvopasture/ scattered	Colombia	2020	8.888889	-76.311836	Exact	https://doi.org/10.1007/s10457-021-00698-4
114	Silvopasture/ scattered	Colombia	2020	8.742607	-76.324613	Exact	https://doi.org/10.1007/s10457-021-00698-4
115	Silvopasture/ scattered	Colombia	2020	8.184964885106458	-75.53034403346331	Exact	https://doi.org/10.1007/s10457-021-00698-4
116	Silvopasture/ scattered	USA	2016	44.591072	-73.895447	Exact	https://doi.org/10.1007/s10457-016-0040-y
117	Silvopasture/ scattered	India	2017	10.548560728557026	76.2676781505486	Exact	https://doi.org/10.1007/s10457-016-0059-00
118	Silvopasture/ scattered	Ethiopia	2024	13.183333	39.549999	Exact	https://doi.org/10.1016/j.agsy.2024.103967
119	Silvopasture/ scattered	Ethiopia	2024	13.633333	39.166668	Exact	https://doi.org/10.1016/j.agsy.2024.103967
120	Silvopasture/ scattered	Ethiopia	2024	14.033334	39.066666	Exact	https://doi.org/10.1016/j.agsy.2024.103967
121	Silvopasture/ scattered	Spain	2022	38.379064	-4.757308	Exact	https://doi.org/10.1016/j.scitotenv.2022.155535
122	Silvopasture/ scattered	Italy	2021	40.644165	9.259167	Exact	https://doi.org/10.1016/j.eja.2021.126348
123	Silvopasture/ scattered	Sudan	2016	13.266666	30.483334	Exact	https://doi.org/10.1016/j.foreco.2016.03.003
124	Silvopasture/ scattered	Sudan	2016	13.316667	30.166666	Exact	https://doi.org/10.1016/j.foreco.2016.03.003
125	Silvopasture/ scattered	Peru	2016	-10.765573	-75.260399	Exact	https://doi.org/10.1007/s10457-015-9865-z
126	Silvopasture/ scattered	Peru	2016	-10.708752	-75.257141	Exact	https://doi.org/10.1007/s10457-015-9865-z
127	Silvopasture/ scattered	USA	2021	42.837003	-90.801608	Exact	https://doi.org/10.1007/s10457-021-00707-6
128	Silvopasture/ scattered	USA	2019	46.349998	-94.366669	Exact	https://doi.org/10.1007/s10457-017-0098-1
129	Silvopasture/ scattered	USA	2019	46.183334	-94.150002	Exact	https://doi.org/10.1007/s10457-017-0098-1
130	Silvopasture/ scattered	Urugway	2024	-32.377773	-58.063906	Exact	https://doi.org/10.1007/s10457-024-01027-1
131	Silvopasture/ scattered	Urugway	2024	-31.724762	-55.805297	Exact	https://doi.org/10.1007/s10457-024-01027-1
132	Silvopasture/ scattered	Argentina	2024	-54.093613	-67.681664	Exact	https://doi.org/10.1007/s10457-024-01013-7
133	Silvopasture/ scattered	Morocco	2024	35.1079576816121	-6.12255752548951	Exact	https://doi.org/10.3390/land13050649
134	Silvopasture/ scattered	Senegal	2024	14.6999584751664	-16.4835478790162	Exact	https://doi.org/10.1016/j.fcr.2023.109206
135	Silvopasture/ scattered	Benin	2023	10.4999847864947	2.50000228528202	Exact	https://doi.org/10.1038/s41598-023-49119-9
136	Silvopasture/ scattered	Burkina Fasso	2023	12.0800419531971	-1.56662378698618	Exact	https://doi.org/10.1016/j.jaridenv.2023.105051
137	Silvopasture/ scattered	Spain	2022	37.2425257414588	-6.3270009726102	Exact	https://doi.org/10.1007/s11056-022-09922-0
138	Silvopasture/ scattered	Bhutan	2020	27.4369783131491	89.5120065798659	Exact	https://doi.org/10.1111/rec.13176
139	Silvopasture/ scattered	Iran	2021	31.6970082737052	50.336602324946	Exact	http://dx.doi.org/10.1002/ldr.4154
140	Silvopasture/ scattered	Sweden	2021	58.4499887466342	11.4166023256893	Exact	https://doi.org/10.1111/1365-2745.13783
141	Silvopasture/ scattered	Spain	2017	41.21668281228	-6.40003218832321	Exact	https://doi.org/10.1111/jvs.12550
142	Silvopasture/ scattered	USA	2024	37.1043356661566	-77.9572983272984	Exact	https://doi.org/10.1007/s10457-023-00889-1
143	Silvopasture/ scattered	Brazil	2021	-25.7144616363474	-53.0761149449333	Exact	https://doi.org/10.1007/s11250-021-02648-9
144	Silvopasture/ scattered	USA	2020	32.4441309703319	-85.7333818408569	Exact	https://doi.org/10.1007/s10457-020-00577-4
145	Silvopasture/ scattered	Brazil	2019	-21.5506585836303	-43.0997854275172	Exact	https://doi.org/10.1038/s41598-020-68973-5
146	Silvopasture/ scattered	USA	2021	32.4426608917372	-85.7324247619894	Exact	https://doi.org/10.1007/s10457-021-00709-4
147	Silvopasture/ scattered	Greece	2016	38.6077932040065	21.2156105385364	Exact	AGFORWARD (613520) : Valonia Oak Silvopastoral Systems in Greece
148	Silvopasture/ scattered	Greece	2017	37.5799927763446	24.3255641769698	Exact	Pantera. Α.. “The traditional agrosilvopastoral valonia oak systems in Kea island-Greece: productivity and ecosystem services.” (2017).
149	Silvopasture/ scattered	Finland	2023	61.9693067706063	23.549725438182	Exact	University of Helsinki : The effect of silvopasture on trees. cattle. and the environment
150	Silvopasture/ scattered	Finland	2023	60.1335968542932	24.6232192121456	Estimated	University of Helsinki : The effect of silvopasture on trees. cattle. and the environment

## Sheet: Natural trees
Id	Y	X	Reference
251	-21.20006045	34.25879523	https://doi.org/10.5281/zenodo.4541513
252	-1.001794487	41.39124719	https://doi.org/10.5281/zenodo.4541513
253	-11.81477392	43.36391404	https://doi.org/10.5281/zenodo.4541513
254	4.538665213	-7.13224	https://doi.org/10.5281/zenodo.4541513
255	-4.388116778	11.73991992	https://doi.org/10.5281/zenodo.4541513
256	6.022500723	-8.957806412	https://doi.org/10.5281/zenodo.4541513
257	-15.14865279	19.757	https://doi.org/10.5281/zenodo.4541513
258	5.702305993	-8.489022537	https://doi.org/10.5281/zenodo.4541513
259	52.1662900899999	141.450238799999	https://doi.org/10.5281/zenodo.4541513
260	1.937893562	104.094837699999	https://doi.org/10.5281/zenodo.4541513
261	-0.841213341	109.5150608	https://doi.org/10.5281/zenodo.4541513
262	-8.306685899	115.129623699999	https://doi.org/10.5281/zenodo.4541513
263	-3.207790762	113.7239517	https://doi.org/10.5281/zenodo.4541513
264	60.8865278299999	132.972276999999	https://doi.org/10.5281/zenodo.4541513
265	32.32573046	69.7702541099999	https://doi.org/10.5281/zenodo.4541513
266	4.839986897	115.1708667	https://doi.org/10.5281/zenodo.4541513
267	12.08800682	99.9597116799999	https://doi.org/10.5281/zenodo.4541513
268	-32.77959193	150.460782399999	https://doi.org/10.5281/zenodo.4541513
269	-14.4476870099999	135.5456823	https://doi.org/10.5281/zenodo.4541513
270	-28.00131901	152.317787799999	https://doi.org/10.5281/zenodo.4541513
271	-20.30286662	147.630975	https://doi.org/10.5281/zenodo.4541513
272	-20.6775314299999	148.270957199999	https://doi.org/10.5281/zenodo.4541513
273	-35.30658666	141.671538199999	https://doi.org/10.5281/zenodo.4541513
274	-30.59818945	152.424	https://doi.org/10.5281/zenodo.4541513
275	60.05851614	34.77189998	https://doi.org/10.5281/zenodo.4541513
276	56.58926198	46.88157856	https://doi.org/10.5281/zenodo.4541513
277	67.00849241	39.22338958	https://doi.org/10.5281/zenodo.4541513
278	64.6193	15.3879	https://doi.org/10.5281/zenodo.4541513
279	58.80854763	39.85598181	https://doi.org/10.5281/zenodo.4541513
280	68.4068933199999	32.8072143699999	https://doi.org/10.5281/zenodo.4541513
281	61.8345042099999	58.72532438	https://doi.org/10.5281/zenodo.4541513
282	64.42732723	38.79341308	https://doi.org/10.5281/zenodo.4541513
283	65.5624328499999	-148.576072799999	https://doi.org/10.5281/zenodo.4541513
284	62.67031541	-112.658570999999	https://doi.org/10.5281/zenodo.4541513
285	55.8212235499999	-112.6064831	https://doi.org/10.5281/zenodo.4541513
286	51.8654	-66.0775	https://doi.org/10.5281/zenodo.4541513
287	50.65319773	-69.4335755099999	https://doi.org/10.5281/zenodo.4541513
288	44.60032178	-115.1319663	https://doi.org/10.5281/zenodo.4541513
289	10.0885	-83.96733147	https://doi.org/10.5281/zenodo.4541513
290	-0.16591311	-66.9680675	https://doi.org/10.5281/zenodo.4541513
291	-25.1319979899999	-48.6348115999999	https://doi.org/10.5281/zenodo.4541513
292	-25.13844363	-53.7035663099999	https://doi.org/10.5281/zenodo.4541513
293	-7.773504054	-65.6161341699999	https://doi.org/10.5281/zenodo.4541513
294	-42.80087539	-74.0954243399999	https://doi.org/10.5281/zenodo.4541513
295	3.288639742	-76.6555903299999	https://doi.org/10.5281/zenodo.4541513
296	-1.335	-62.5242	https://doi.org/10.5281/zenodo.4541513
297	1.23013	-77.11647433	https://doi.org/10.5281/zenodo.4541513
298	12.08800682	99.9597116799999	https://doi.org/10.5281/zenodo.4541513
299	63.3345311499999	96.4761491999999	https://doi.org/10.5281/zenodo.4541513
300	-2.710100377	116.269497099999	https://doi.org/10.5281/zenodo.4541513
