# Supplementary material
Source: Research Square preprint supplement (doi:10.21203/rs.3.rs-7961411/v1)
Supplement: Supplementary file 2 [file fdef8f29f776391505240f65.xlsx]

## Sheet: ClassID
System	Class ID
Alley cropping	1
Hedgerows	2
Scattered AF	3
Orchards	4
Croplands without trees	5
Natural trees	6

## Sheet: Raw data
IDCode	Actual	Interpreter1	Interpreter3	Interpreter3	Interpreter4	Interpreter5
1	1	3	5	#N/A	3	1
2	1	#N/A	#N/A	#N/A	#N/A	#N/A
3	1	1	1	1	1	1
4	1	1	#N/A	#N/A	#N/A	#N/A
5	1	3	3	#N/A	3	1
6	1	1	1	1	1	1
7	1	1	1	1	1	1
8	1	1	4	1	1	#N/A
9	1	1	#N/A	1	4	1
10	1	1	4	1	1	#N/A
11	1	1	1	1	1	1
12	1	1	4	4	#N/A	1
13	1	4	4	4	1	#N/A
14	1	1	1	1	1	1
15	1	5	2	1	#N/A	1
16	1	1	#N/A	1	#N/A	#N/A
17	1	#N/A	#N/A	#N/A	#N/A	1
18	1	1	1	1	1	1
19	1	1	1	1	1	1
20	1	1	#N/A	1	1	1
21	1	4	#N/A	6	1	1
22	1	1	1	1	1	1
23	1	1	#N/A	1	1	1
24	1	#N/A	#N/A	#N/A	#N/A	#N/A
25	1	1	1	1	1	1
26	1	1	1	1	1	1
27	1	#N/A	#N/A	#N/A	#N/A	#N/A
28	1	1	3	1	3	1
29	1	1	1	1	1	1
30	1	1	1	1	1	1
31	1	1	1	1	1	1
32	1	1	1	1	1	1
33	1	1	4	4	1	#N/A
34	1	1	4	1	1	1
35	1	1	1	1	1	1
36	1	1	1	1	1	1
37	1	1	1	1	1	1
38	1	1	#N/A	1	1	1
39	1	1	1	1	1	1
40	1	1	1	1	1	1
41	1	1	1	1	1	1
42	1	1	1	1	1	1
43	1	1	4	1	4	#N/A
44	1	4	4	4	4	1
45	1	1	1	1	1	1
46	1	1	2	1	1	#N/A
47	1	4	4	4	4	1
48	1	1	1	1	1	1
49	1	4	4	4	#N/A	1
50	1	1	5	5	4	1
51	2	2	2	#N/A	2	2
52	2	2	#N/A	#N/A	2	2
53	2	2	#N/A	#N/A	#N/A	2
54	2	#N/A	#N/A	#N/A	#N/A	#N/A
55	2	#N/A	#N/A	#N/A	#N/A	#N/A
56	2	#N/A	#N/A	#N/A	#N/A	#N/A
57	2	2	2	2	2	2
58	2	2	2	2	2	2
59	2	2	2	2	2	2
60	2	2	2	2	2	2
61	2	2	2	2	2	2
62	2	2	2	2	2	2
63	2	2	2	2	2	2
64	2	2	2	2	2	2
65	2	#N/A	#N/A	#N/A	#N/A	#N/A
66	2	2	2	2	2	2
67	2	2	2	2	2	2
68	2	2	2	6	2	#N/A
69	2	2	2	#N/A	#N/A	#N/A
70	2	2	2	2	2	2
71	2	2	2	2	2	2
72	2	2	2	2	2	2
73	2	2	2	2	2	2
74	2	2	2	2	2	2
75	2	2	2	2	2	2
76	2	2	2	2	2	2
77	2	2	2	2	2	2
78	2	2	2	2	2	2
79	2	2	2	2	2	2
80	2	2	2	2	2	2
81	2	2	2	2	2	2
82	2	2	2	2	2	2
83	2	2	2	2	2	2
84	2	2	2	2	2	2
85	2	1	1	#N/A	1	2
86	2	2	2	2	2	2
87	2	2	2	2	2	2
88	2	2	2	2	2	2
89	2	2	2	2	2	2
90	2	2	2	2	2	2
91	2	2	2	2	2	2
92	2	2	2	2	2	2
93	2	2	2	2	2	2
94	2	2	2	2	2	2
95	2	2	2	2	2	2
96	2	2	2	2	2	2
97	2	2	2	2	2	2
98	2	2	2	2	2	2
99	2	2	2	2	3	2
100	2	2	2	#N/A	2	2
101	3	3	3	3	3	3
102	3	3	3	3	3	3
103	3	3	3	3	3	3
104	3	3	5	3	3	3
105	3	3	3	1	1	#N/A
106	3	3	3	3	3	3
107	3	3	3	3	3	3
108	3	3	3	3	3	3
109	3	3	3	3	6	3
110	3	3	#N/A	6	#N/A	3
111	3	3	#N/A	3	3	3
112	3	6	6	6	6	3
113	3	6	6	6	6	3
114	3	3	3	3	3	3
115	3	6	6	6	6	3
116	3	3	6	3	6	3
117	3	#N/A	#N/A	3	#N/A	#N/A
118	3	3	2	3	#N/A	3
119	3	#N/A	#N/A	#N/A	#N/A	3
120	3	3	#N/A	#N/A	3	3
121	3	3	3	3	3	3
122	3	6	6	6	1	#N/A
123	3	3	3	3	3	3
124	3	3	3	3	3	3
125	3	3	#N/A	#N/A	#N/A	#N/A
126	3	6	6	6	6	3
127	3	6	6	6	6	3
128	3	6	6	6	6	3
129	3	#N/A	#N/A	#N/A	#N/A	#N/A
130	3	3	#N/A	#N/A	#N/A	3
131	3	5	5	5	5	#N/A
132	3	6	3	6	3	#N/A
133	3	3	6	3	3	3
134	3	3	3	3	3	3
135	3	3	#N/A	#N/A	#N/A	3
136	3	3	3	3	3	3
137	3	3	3	3	3	3
138	3	6	6	6	6	3
139	3	3	3	3	3	3
140	3	3	3	6	#N/A	3
141	3	3	3	3	3	3
142	3	3	4	6	3	3
143	3	6	6	6	6	3
144	3	3	6	6	3	#N/A
145	3	3	3	3	3	3
146	3	6	6	6	6	3
147	3	3	3	3	3	3
148	3	3	1	3	3	#N/A
149	3	#N/A	3	6	#N/A	3
150	3	6	6	6	6	3
151	4	1	4	4	4	4
152	4	1	1	1	1	4
153	4	1	1	1	1	4
154	4	1	4	4	4	4
155	4	1	1	1	1	4
156	4	1	1	1	1	4
157	4	1	#N/A	1	1	4
158	4	#N/A	#N/A	#N/A	#N/A	4
159	4	4	4	4	4	4
160	4	4	4	4	4	4
161	4	4	4	4	4	4
162	4	1	1	4	1	#N/A
163	4	3	3	3	3	4
164	4	1	1	1	1	4
165	4	1	1	1	1	4
166	4	1	4	4	4	4
167	4	4	#N/A	#N/A	#N/A	4
168	4	1	1	1	#N/A	4
169	4	4	4	#N/A	#N/A	#N/A
170	4	1	4	4	4	4
171	4	1	1	1	1	4
172	4	4	4	5	5	#N/A
173	4	1	4	4	1	4
174	4	1	4	1	1	4
175	4	#N/A	4	4	#N/A	4
176	4	1	1	1	1	4
177	4	1	1	1	1	4
178	4	1	1	1	1	4
179	4	4	4	4	4	4
180	4	5	4	4	4	4
181	4	1	4	5	4	4
182	4	4	#N/A	#N/A	4	4
183	4	1	1	4	4	4
184	4	4	5	4	4	4
185	4	4	4	1	1	4
186	4	4	1	4	4	4
187	4	4	4	4	4	4
188	4	1	1	4	1	#N/A
189	4	1	4	4	1	4
190	4	1	4	4	1	4
191	4	4	4	4	4	4
192	4	6	#N/A	1	#N/A	4
193	4	4	#N/A	6	4	4
194	4	4	#N/A	#N/A	4	4
195	4	1	1	1	1	4
196	4	1	1	#N/A	1	4
197	4	4	4	4	#N/A	4
198	4	1	4	4	4	4
199	4	#N/A	#N/A	4	#N/A	4
200	4	1	1	1	1	4
201	5	5	5	5	5	5
202	5	5	#N/A	#N/A	5	5
203	5	5	5	5	5	5
204	5	5	5	5	5	5
205	5	5	5	5	5	5
206	5	5	5	5	5	5
207	5	5	5	5	5	5
208	5	5	5	#N/A	5	5
209	5	5	5	5	5	5
210	5	5	5	5	5	5
211	5	2	5	5	5	#N/A
212	5	5	#N/A	5	5	5
213	5	5	5	5	5	5
214	5	5	5	5	5	5
215	5	5	5	5	5	5
216	5	5	5	5	5	5
217	5	5	5	5	5	5
218	5	5	5	5	5	5
219	5	#N/A	#N/A	5	5	#N/A
220	5	5	5	5	5	5
221	5	5	5	5	5	5
222	5	5	5	5	5	5
223	5	5	3	5	5	5
224	5	4	5	5	4	#N/A
225	5	5	5	5	5	5
226	5	5	5	5	5	5
227	5	5	5	5	5	5
228	5	5	5	5	5	5
229	5	5	5	5	5	5
230	5	5	2	5	2	#N/A
231	5	#N/A	6	5	6	5
232	5	5	5	5	5	#N/A
233	5	5	5	5	5	5
234	5	5	5	5	2	#N/A
235	5	5	5	5	5	5
236	5	5	5	5	5	5
237	5	5	5	5	5	5
238	5	5	5	1	5	5
239	5	5	5	5	5	5
240	5	5	5	5	5	5
241	5	5	5	5	5	5
242	5	5	5	5	5	5
243	5	5	#N/A	3	5	5
244	5	5	5	5	5	5
245	5	5	5	5	5	5
246	5	5	5	5	5	5
247	5	5	5	5	5	5
248	5	5	5	5	5	5
249	5	5	5	5	6	5
250	5	5	2	5	5	#N/A
251	6	6	3	3	6	6
252	6	6	6	6	6	6
253	6	6	6	6	6	6
254	6	6	6	6	6	6
255	6	6	6	6	6	6
256	6	6	6	6	6	6
257	6	6	6	6	6	6
258	6	6	6	6	6	6
259	6	6	6	6	6	6
260	6	6	6	6	6	6
261	6	6	6	6	6	6
262	6	6	6	6	6	6
263	6	6	6	6	6	6
264	6	6	6	6	6	6
265	6	6	6	6	6	6
266	6	6	6	6	6	6
267	6	6	6	6	6	6
268	6	6	6	6	6	6
269	6	6	6	6	6	6
270	6	6	6	6	6	6
271	6	6	6	6	6	6
272	6	6	6	6	6	6
273	6	6	6	6	#N/A	6
274	6	6	6	6	6	6
275	6	6	6	6	6	6
276	6	6	6	6	6	6
277	6	6	6	6	6	6
278	6	6	3	6	#N/A	6
279	6	6	6	6	6	6
280	6	6	6	6	6	6
281	6	6	6	6	6	6
282	6	6	6	6	6	6
283	6	6	6	6	6	6
284	6	6	6	6	6	6
285	6	6	#N/A	6	6	6
286	6	6	6	6	6	6
287	6	6	6	6	6	6
288	6	6	#N/A	6	#N/A	6
289	6	6	6	6	6	6
290	6	6	6	6	6	6
291	6	6	6	6	6	6
292	6	6	6	6	6	6
293	6	6	6	6	6	6
294	6	6	6	6	6	6
295	6	6	6	6	6	6
296	6	6	6	6	6	6
297	6	6	6	6	6	6
298	6	6	6	6	6	6
299	6	6	6	6	6	6
300	6	6	6	6	6	6

## Sheet: Intrepreter 1 
IDCode	LAT	LON	Actual	Interpreted	Reason
286	51.8654	-66.0775	6	6	No error
258	5.702305993	-8.489022537	6	6	No error
41	37.90844814784964	23.83395797834276	1	1	No error
256	6.022500723	-8.957806412	6	6	No error
3	36.7086691700405	9.509848011078669	1	1	No error
280	68.4068933199999	32.8072143699999	6	6	No error
62	50.769630766711494	3.803457290523237	2	2	No error
161	-34.06848898575076	19.112423401638708	4	4	No error
191	-40.882903494475	-72.8374678302501	4	4	No error
232	49.4534344652502	117.25029574428	5	5	No error
64	53.185855910581786	11.956317247221055	2	2	No error
271	-20.30286662	147.630975	6	6	No error
225	45.8340509098807	0.0958312716421858	5	5	No error
75	55.767828482868985	13.607174581621063	2	2	No error
248	31.2500097862897	30.9523785034499	5	5	No error
259	52.1662900899999	141.450238799999	6	6	No error
92	14.566732	-60.974873	2	2	No error
106	14.46334811594152	-16.2984731164179	3	3	No error
275	60.05851614	34.77189998	6	6	No error
228	37.6177023033246	-5.80411110593954	5	5	No error
295	3.288639742	-76.6555903299999	6	6	No error
71	49.92882	3.83469	2	2	No error
203	49.6440055781392	33.5035794103495	5	5	No error
40	36.632269	10.279716	1	1	No error
97	48.3902578764688	18.9812340620389	2	2	No error
73	63.34641015699603	10.22642786769913	2	2	No error
297	1.23013	-77.11647433	6	6	No error
11	37.992146	23.783314	1	1	No error
244	33.250147500528	-7.348143933848496	5	5	No error
245	11.9524148873762	-15.2501476483312	5	5	No error
242	-27.7510241352835	26.4514732916214	5	5	No error
6	43.704166	3.861389	1	1	No error
298	12.08800682	99.9597116799999	6	6	No error
262	-8.306685899	115.129623699999	6	6	No error
84	53.037109	-3.712	2	2	No error
139	31.6970082737052	50.336602324946	3	3	No error
290	-0.16591311	-66.9680675	6	6	No error
237	39.4522705811589	118.250042166742	5	5	No error
91	14.657885	-60.918079	2	2	No error
292	-25.13844363	-53.7035663099999	6	6	No error
293	-7.773504054	-65.6161341699999	6	6	No error
247	32.4529966026438	20.7505793550973	5	5	No error
210	51.2277118478797	42.6525724980848	5	5	No error
79	54.00198783571939	10.437560905415348	2	2	No error
114	8.742607	-76.324613	3	3	No error
66	53.19775545358287	11.907486441226828	2	2	No error
222	15.9011726827518	105.12056649173	5	5	No error
37	34.966255	-2.502569	1	1	No error
252	-1.001794487	41.39124719	6	6	No error
86	47.98967494171678	-1.7676714261755315	2	2	No error
276	56.58926198	46.88157856	6	6	No error
179	41.668274	0.457841	4	4	No error
78	54.02643940862905	10.394076289951498	2	2	No error
253	-11.81477392	43.36391404	6	6	No error
63	53.18509	11.91086	2	2	No error
279	58.80854763	39.85598181	6	6	No error
287	50.65319773	-69.4335755099999	6	6	No error
83	53.033459	-3.747871	2	2	No error
267	12.08800682	99.9597116799999	6	6	No error
216	-32.9655631720742	-63.2626884845132	5	5	No error
215	42.0671227826636	-79.2710478785349	5	5	No error
70	49.943525958815556	3.8388689961437517	2	2	No error
268	-32.77959193	150.460782399999	6	6	No error
209	52.2001250471091	61.9158925058726	5	5	No error
36	35.010834	-2.406389	1	1	No error
72	63.37024609997477	10.085872333433707	2	2	No error
274	-30.59818945	152.424	6	6	No error
141	41.21668281228	-6.40003218832321	3	3	No error
187	33.026064	35.582158	4	4	No error
227	36.2177022216284	5.78748043103657	5	5	No error
77	55.801733843529	13.605619524959149	2	2	No error
236	32.9530651846701	-110.749957086671	5	5	No error
58	51.49282026888746	9.9098317806673	2	2	No error
201	51.0092333622998	6.31251072725553	5	5	No error
67	58.52810955588557	26.888985717525262	2	2	No error
299	63.3345311499999	96.4761491999999	6	6	No error
300	-2.710100377	116.269497099999	6	6	No error
88	48.13993357915797	-3.6133280002615207	2	2	No error
26	5.273170	-3.831467	1	1	No error
291	-25.1319979899999	-48.6348115999999	6	6	No error
101	14.268847	-16.21689	3	3	No error
22	38.464802	38.358646	1	1	No error
264	60.8865278299999	132.972276999999	6	6	No error
226	43.3432081424584	0.10386629080584	5	5	No error
48	42.809592	12.661176	1	1	No error
134	14.6999584751664	-16.4835478790162	3	3	No error
87	18.752739	82.7008	2	2	No error
284	62.67031541	-112.658570999999	6	6	No error
220	-34.6734838324052	138.620349329075	5	5	No error
81	53.97620292186878	10.531712929413086	2	2	No error
32	34.051821186419204	-5.087481105790628	1	1	No error
82	-30.399438743001884	29.398361014304466	2	2	No error
137	37.2425257414588	-6.3270009726102	3	3	No error
93	14.720639	-60.995834	2	2	No error
98	18.752813524518814	82.70098684675294	2	2	No error
7	36.09103272806777	-94.19001395311489	1	1	No error
218	-37.0889363032622	-59.2799511226309	5	5	No error
107	13.948215273679377	-16.0621789683836	3	3	No error
296	-1.335	-62.5242	6	6	No error
270	-28.00131901	152.317787799999	6	6	No error
233	20.6518864067181	77.5506940007883	5	5	No error
61	50.977627868727055	3.7573715668778087	2	2	No error
265	32.32573046	69.7702541099999	6	6	No error
35	38.349980	22.200035	1	1	No error
241	54.4516574951856	74.7487499108088	5	5	No error
159	-32.94867775558334	19.208296159493095	4	4	No error
257	-15.14865279	19.757	6	6	No error
29	45.14211852330132	11.503775721077291	1	1	No error
19	23.272148	85.347221	1	1	No error
213	41.8842640351293	-5.33734161526936	5	5	No error
289	10.0885	-83.96733147	6	6	No error
239	44.4525188256091	19.9524881866264	5	5	No error
221	-30.5211078608582	116.960034494869	5	5	No error
60	50.914074427459745	3.7565180347858673	2	2	No error
260	1.937893562	104.094837699999	6	6	No error
204	50.0089502480585	27.2453879537744	5	5	No error
14	46.198334	-0.176944	1	1	No error
147	38.6077932040065	21.2156105385364	3	3	No error
124	13.316667	30.166666	3	3	No error
136	12.0800419531971	-1.56662378698618	3	3	No error
94	46.75735080370743	16.35524920883918	2	2	No error
217	51.2658896134419	35.0584054535383	5	5	No error
160	-33.366657683051734	19.32420703257895	4	4	No error
214	17.3012288727539	81.0791556022562	5	5	No error
74	63.498139180069515	9.798302890963093	2	2	No error
57	51.68348626659701	-1.8993562729494038	2	2	No error
89	47.010551149722524	-0.7475334387811696	2	2	No error
42	33.953213	-5.531949	1	1	No error
39	33.9302927332058	-5.27464831864597	1	1	No error
281	61.8345042099999	58.72532438	6	6	No error
90	14.691082	-61.007736	2	2	No error
205	41.8600346625196	-96.6207697547647	5	5	No error
145	-21.5506585836303	-43.0997854275172	3	3	No error
103	14.711522	-16.569209	3	3	No error
31	36.107022	110.593902	1	1	No error
45	19.022005028170632	-102.26426151114724	1	1	No error
123	13.266666	30.483334	3	3	No error
30	40.111084090438595	23.342216676316202	1	1	No error
282	64.42732723	38.79341308	6	6	No error
240	54.4523525742887	30.7501017094844	5	5	No error
121	38.379064	-4.757308	3	3	No error
266	4.839986897	115.1708667	6	6	No error
229	44.5760023768834	5.829094855088	5	5	No error
108	31.995559	-6.519025	3	3	No error
246	38.651819486776	27.95232735394	5	5	No error
235	-30.0476238189097	-51.7500094164733	5	5	No error
261	-0.841213341	109.5150608	6	6	No error
272	-20.6775314299999	148.270957199999	6	6	No error
254	4.538665213	-7.13224	6	6	No error
283	65.5624328499999	-148.576072799999	6	6	No error
59	50.92851187199253	3.74146926864259	2	2	No error
294	-42.80087539	-74.0954243399999	6	6	No error
76	55.782439420159	13.647891030628605	2	2	No error
263	-3.207790762	113.7239517	6	6	No error
18	45.30656281218369	18.439042708798166	1	1	No error
95	54.732922121167995	-5.854950610656353	2	2	No error
25	-20.9164531809137	-44.8538677139821	1	1	No error
102	14.787437	-16.63992	3	3	No error
206	53.5507484852754	-109.069944726948	5	5	No error
269	-14.4476870099999	135.5456823	6	6	No error
96	54.9523944675765	-5.96757343236372	2	2	No error
277	67.00849241	39.22338958	6	6	No error
207	17.459229569448	103.137379111002	5	5	No error
80	53.997042037211784	10.538243848195426	2	2	No error
255	-4.388116778	11.73991992	6	6	No error
130	-32.377773	-58.063906	3	3	No error
288	44.60032178	-115.1319663	6	6	No error
202	43.02673539948	-95.0380002411782	5	5	No error
110	12.683333	-1.566667	3	3	No error
120	14.033334	39.066666	3	3	No error
208	-41.8650950055731	147.054234315551	5	5	No error
12	43.68227994265581	10.341805567386645	1	1	No error
118	13.183333	39.549999	3	3	No error
140	58.4499887466342	11.4166023256893	3	3	No error
273	-35.30658666	141.671538199999	6	6	No error
69	58.6063	27.12124	2	2	No error
278	64.6193	15.3879	6	6	No error
285	55.8212235499999	-112.6064831	6	6	No error
243	-27.8482028233127	25.9523529432793	5	5	No error
23	46.338490	-73.183829	1	1	No error
111	12.1	0.483333	3	3	No error
193	33.764133	44.634036	4	4	No error
9	47.590389	19.331944	1	1	No error
212	-31.4406609891585	-52.8542309515209	5	5	No error
38	33.895583	-4.673943	1	1	No error
186	32.984379	35.565368	4	4	No error
68	58.5283	26.9537	2	2	No error
105	15.034711	-16.785583	3	3	No error
50	38.08440778212971	77.16651214623651	1	1	No error
53	-29.4511604393034	30.54222573267856	2	2	No error
4	2.787286740071601	102.9223379147263	1	1	No error
52	0.435786	34.856698	2	2	No error
116	44.591072	-73.895447	3	3	No error
251	-21.20006045	34.25879523	6	6	No error
99	53.0400152299562	-3.70998434299617	2	2	No error
234	45.4521509296132	11.749964119154	5	5	No error
184	37.913055	-7.953195	4	4	No error
10	37.958611	-0.938056	1	1	No error
250	27.9525326108597	68.750053642064	5	5	No error
169	-15.066675	-43.800009	4	4	No error
125	-10.765573	-75.260399	3	3	No error
104	13.772321	-15.993486	3	3	No error
43	-2.348333	-48.262222	1	1	No error
194	-7.789276	112.530396	4	4	No error
167	-42.996077	147.056947	4	4	No error
34	3.397500046352276	101.2063047720452	1	1	No error
16	51.78960040466635	14.632735333218283	1	1	No error
33	42.54193046547715	11.444650548117998	1	1	No error
230	26.4522486945767	77.7499531946969	5	5	No error
28	1.180657	34.299416	1	1	No error
46	47.346416	8.761666	1	1	No error
182	42.5159729128231	70.4928210860305	4	4	No error
172	23.498597	114.468379	4	4	No error
109	32.050359	-6.568774	3	3	No error
148	37.5799927763446	24.3255641769698	3	3	No error
20	43.61218401296337	3.9765024568908256	1	1	No error
197	23.2795369004329	85.4105470600493	4	4	No error
144	32.4441309703319	-85.7333818408569	3	3	No error
133	35.1079576816121	-6.12255752548951	3	3	No error
185	41.5088993001528	0.8532220897562127	4	4	No error
100	47.995137	-1.765256	2	2	No error
51	0.186462	34.741375	2	2	No error
223	-40.1155553582133	175.362461435698	5	5	No error
142	37.1043356661566	-77.9572983272984	3	3	No error
135	10.4999847864947	2.50000228528202	3	3	No error
8	2.7779644062299687	102.91932864685018	1	1	No error
249	35.4526169438587	36.2499034385215	5	5	No error
238	53.2499574074016	5.95237944969087	5	5	No error
127	42.837003	-90.801608	3	6	Decision tree
155	14.798056	-17.142221	4	1	Decision tree
164	41.358612	-7.039444	4	1	Decision tree
156	14.790303	-17.228687	4	1	Decision tree
183	43.5487720953597	13.3646199004946	4	1	Decision tree
176	36.46961021406719	7.528619953153321	4	1	Decision tree
163	14.790277	-17.205	4	3	Decision tree
44	-1.941329	103.251968	1	4	Decision tree
146	32.4426608917372	-85.7324247619894	3	6	Decision tree
171	41.443531	-4.898066	4	1	Decision tree
200	33.4031045294392	35.6547929396586	4	1	Decision tree
178	37.91815	15.981421	4	1	Decision tree
165	37.510708	-5.962494	4	1	Decision tree
113	8.888889	-76.311836	3	6	Decision tree
1	26.093292455014577	32.479788106150046	1	3	Decision tree
47	5.05832252388531	-2.49706891611228	1	4	Decision tree
112	8.510305	-76.103584	3	6	Decision tree
195	32.9500011038224	129.959998248829	4	1	Decision tree
126	-10.708752	-75.257141	3	6	Decision tree
128	46.349998	-94.366669	3	6	Decision tree
174	8.95360578762234	7.693436743274174	4	1	Decision tree
190	24.416824	46.574928	4	1	Decision tree
150	60.1335968542932	24.6232192121456	3	6	Decision tree
153	14.994166	-16.990278	4	1	Decision tree
177	29.183775380431367	-107.4206235328462	4	1	Decision tree
196	43.1512136558088	141.96580362202	4	1	Decision tree
85	47.395226	19.147882	2	1	Decision tree
173	38.112377	-3.16324	4	1	Decision tree
5	46.681164	19.550394	1	3	Decision tree
143	-25.7144616363474	-53.0761149449333	3	6	Decision tree
138	27.4369783131491	89.5120065798659	3	6	Decision tree
115	8.184964885106458	-75.53034403346331	3	6	Decision tree
170	-22.623802	-49.678967	4	1	Decision tree
152	14.983611	-17.003889	4	1	Decision tree
192	33.714034	44.635779	4	6	Decision tree
168	32.02140524767173	73.04407177089517	4	1	Decision tree
49	19.5486087254347	109.47496931451	1	4	Decision tree
157	14.804289	-17.209672	4	1	Decision tree
21	43.67544249713808	10.92313257621417	1	4	Decision tree
211	-43.2065216316647	172.69534536665	5	2	Interpreter's error
224	47.2426899234225	-0.0458355421625186	5	4	Interpreter's error
132	-54.093613	-67.681664	3	6	Interpreter's error
188	32.7798733328526	35.7569877158322	4	1	Interpreter's error
131	-31.724762	-55.805297	3	5	Interpreter's error
198	-25.0962926548053	152.334424894043	4	1	Interpreter's error
162	14.788752	-17.227163	4	1	Interpreter's error
154	14.826335	-17.10166	4	1	Interpreter's error
13	46.010834	-0.2325	1	4	Interpreter's error
181	41.6684965888115	0.456689428394522	4	1	Interpreter's error
189	32.854476	35.698701	4	1	Interpreter's error
166	-36.422167	145.458899	4	1	Interpreter's error
180	35.4981644449096	-119.660849047785	4	5	Interpreter's error
151	14.828055	-17.096666	4	1	Interpreter's error
122	40.644165	9.259167	3	6	Interpreter's error
15	48.102222	1.299444	1	5	Interpreter's error

## Sheet: Intrepreter 2
IDCode	LAT	LON	Actual	Interpreted	Reason
286	51.8654	-66.0775	6	6	No error
258	5.702305993	-8.489022537	6	6	No error
41	37.90844814784964	23.83395797834276	1	1	No error
256	6.022500723	-8.957806412	6	6	No error
3	36.7086691700405	9.509848011078669	1	1	No error
280	68.4068933199999	32.8072143699999	6	6	No error
62	50.769630766711494	3.803457290523237	2	2	No error
161	-34.06848898575076	19.112423401638708	4	4	No error
191	-40.882903494475	-72.8374678302501	4	4	No error
232	49.4534344652502	117.25029574428	5	5	No error
64	53.185855910581786	11.956317247221055	2	2	No error
271	-20.30286662	147.630975	6	6	No error
225	45.8340509098807	0.0958312716421858	5	5	No error
75	55.767828482868985	13.607174581621063	2	2	No error
248	31.2500097862897	30.9523785034499	5	5	No error
259	52.1662900899999	141.450238799999	6	6	No error
92	14.566732	-60.974873	2	2	No error
106	14.46334811594152	-16.2984731164179	3	3	No error
275	60.05851614	34.77189998	6	6	No error
228	37.6177023033246	-5.80411110593954	5	5	No error
295	3.288639742	-76.6555903299999	6	6	No error
71	49.92882	3.83469	2	2	No error
203	49.6440055781392	33.5035794103495	5	5	No error
40	36.632269	10.279716	1	1	No error
97	48.3902578764688	18.9812340620389	2	2	No error
73	63.34641015699603	10.22642786769913	2	2	No error
297	1.23013	-77.11647433	6	6	No error
11	37.992146	23.783314	1	1	No error
244	33.250147500528	-7.348143933848496	5	5	No error
245	11.9524148873762	-15.2501476483312	5	5	No error
242	-27.7510241352835	26.4514732916214	5	5	No error
6	43.704166	3.861389	1	1	No error
298	12.08800682	99.9597116799999	6	6	No error
262	-8.306685899	115.129623699999	6	6	No error
84	53.037109	-3.712	2	2	No error
139	31.6970082737052	50.336602324946	3	3	No error
290	-0.16591311	-66.9680675	6	6	No error
237	39.4522705811589	118.250042166742	5	5	No error
91	14.657885	-60.918079	2	2	No error
292	-25.13844363	-53.7035663099999	6	6	No error
293	-7.773504054	-65.6161341699999	6	6	No error
247	32.4529966026438	20.7505793550973	5	5	No error
210	51.2277118478797	42.6525724980848	5	5	No error
79	54.00198783571939	10.437560905415348	2	2	No error
114	8.742607	-76.324613	3	3	No error
66	53.19775545358287	11.907486441226828	2	2	No error
222	15.9011726827518	105.12056649173	5	5	No error
37	34.966255	-2.502569	1	1	No error
252	-1.001794487	41.39124719	6	6	No error
86	47.98967494171678	-1.7676714261755315	2	2	No error
276	56.58926198	46.88157856	6	6	No error
179	41.668274	0.457841	4	4	No error
78	54.02643940862905	10.394076289951498	2	2	No error
253	-11.81477392	43.36391404	6	6	No error
63	53.18509	11.91086	2	2	No error
279	58.80854763	39.85598181	6	6	No error
287	50.65319773	-69.4335755099999	6	6	No error
83	53.033459	-3.747871	2	2	No error
267	12.08800682	99.9597116799999	6	6	No error
216	-32.9655631720742	-63.2626884845132	5	5	No error
215	42.0671227826636	-79.2710478785349	5	5	No error
70	49.943525958815556	3.8388689961437517	2	2	No error
268	-32.77959193	150.460782399999	6	6	No error
209	52.2001250471091	61.9158925058726	5	5	No error
36	35.010834	-2.406389	1	1	No error
72	63.37024609997477	10.085872333433707	2	2	No error
274	-30.59818945	152.424	6	6	No error
141	41.21668281228	-6.40003218832321	3	3	No error
187	33.026064	35.582158	4	4	No error
227	36.2177022216284	5.78748043103657	5	5	No error
77	55.801733843529	13.605619524959149	2	2	No error
236	32.9530651846701	-110.749957086671	5	5	No error
58	51.49282026888746	9.9098317806673	2	2	No error
201	51.0092333622998	6.31251072725553	5	5	No error
67	58.52810955588557	26.888985717525262	2	2	No error
299	63.3345311499999	96.4761491999999	6	6	No error
300	-2.710100377	116.269497099999	6	6	No error
88	48.13993357915797	-3.6133280002615207	2	2	No error
26	5.273170	-3.831467	1	1	No error
291	-25.1319979899999	-48.6348115999999	6	6	No error
101	14.268847	-16.21689	3	3	No error
22	38.464802	38.358646	1	1	No error
264	60.8865278299999	132.972276999999	6	6	No error
226	43.3432081424584	0.10386629080584	5	5	No error
48	42.809592	12.661176	1	1	No error
134	14.6999584751664	-16.4835478790162	3	3	No error
87	18.752739	82.7008	2	2	No error
284	62.67031541	-112.658570999999	6	6	No error
220	-34.6734838324052	138.620349329075	5	5	No error
81	53.97620292186878	10.531712929413086	2	2	No error
32	34.051821186419204	-5.087481105790628	1	1	No error
82	-30.399438743001884	29.398361014304466	2	2	No error
137	37.2425257414588	-6.3270009726102	3	3	No error
93	14.720639	-60.995834	2	2	No error
98	18.752813524518814	82.70098684675294	2	2	No error
7	36.09103272806777	-94.19001395311489	1	1	No error
218	-37.0889363032622	-59.2799511226309	5	5	No error
107	13.948215273679377	-16.0621789683836	3	3	No error
296	-1.335	-62.5242	6	6	No error
270	-28.00131901	152.317787799999	6	6	No error
233	20.6518864067181	77.5506940007883	5	5	No error
61	50.977627868727055	3.7573715668778087	2	2	No error
265	32.32573046	69.7702541099999	6	6	No error
35	38.349980	22.200035	1	1	No error
241	54.4516574951856	74.7487499108088	5	5	No error
159	-32.94867775558334	19.208296159493095	4	4	No error
257	-15.14865279	19.757	6	6	No error
29	45.14211852330132	11.503775721077291	1	1	No error
19	23.272148	85.347221	1	1	No error
213	41.8842640351293	-5.33734161526936	5	5	No error
289	10.0885	-83.96733147	6	6	No error
239	44.4525188256091	19.9524881866264	5	5	No error
221	-30.5211078608582	116.960034494869	5	5	No error
60	50.914074427459745	3.7565180347858673	2	2	No error
260	1.937893562	104.094837699999	6	6	No error
204	50.0089502480585	27.2453879537744	5	5	No error
14	46.198334	-0.176944	1	1	No error
147	38.6077932040065	21.2156105385364	3	3	No error
124	13.316667	30.166666	3	3	No error
136	12.0800419531971	-1.56662378698618	3	3	No error
94	46.75735080370743	16.35524920883918	2	2	No error
217	51.2658896134419	35.0584054535383	5	5	No error
160	-33.366657683051734	19.32420703257895	4	4	No error
214	17.3012288727539	81.0791556022562	5	5	No error
74	63.498139180069515	9.798302890963093	2	2	No error
57	51.68348626659701	-1.8993562729494038	2	2	No error
89	47.010551149722524	-0.7475334387811696	2	2	No error
42	33.953213	-5.531949	1	1	No error
39	33.9302927332058	-5.27464831864597	1	1	No error
281	61.8345042099999	58.72532438	6	6	No error
90	14.691082	-61.007736	2	2	No error
205	41.8600346625196	-96.6207697547647	5	5	No error
145	-21.5506585836303	-43.0997854275172	3	3	No error
103	14.711522	-16.569209	3	3	No error
31	36.107022	110.593902	1	1	No error
45	19.022005028170632	-102.26426151114724	1	1	No error
123	13.266666	30.483334	3	3	No error
30	40.111084090438595	23.342216676316202	1	1	No error
282	64.42732723	38.79341308	6	6	No error
240	54.4523525742887	30.7501017094844	5	5	No error
121	38.379064	-4.757308	3	3	No error
266	4.839986897	115.1708667	6	6	No error
229	44.5760023768834	5.829094855088	5	5	No error
108	31.995559	-6.519025	3	3	No error
246	38.651819486776	27.95232735394	5	5	No error
235	-30.0476238189097	-51.7500094164733	5	5	No error
261	-0.841213341	109.5150608	6	6	No error
272	-20.6775314299999	148.270957199999	6	6	No error
254	4.538665213	-7.13224	6	6	No error
283	65.5624328499999	-148.576072799999	6	6	No error
59	50.92851187199253	3.74146926864259	2	2	No error
294	-42.80087539	-74.0954243399999	6	6	No error
76	55.782439420159	13.647891030628605	2	2	No error
263	-3.207790762	113.7239517	6	6	No error
18	45.30656281218369	18.439042708798166	1	1	No error
95	54.732922121167995	-5.854950610656353	2	2	No error
25	-20.9164531809137	-44.8538677139821	1	1	No error
102	14.787437	-16.63992	3	3	No error
206	53.5507484852754	-109.069944726948	5	5	No error
269	-14.4476870099999	135.5456823	6	6	No error
96	54.9523944675765	-5.96757343236372	2	2	No error
277	67.00849241	39.22338958	6	6	No error
207	17.459229569448	103.137379111002	5	5	No error
80	53.997042037211784	10.538243848195426	2	2	No error
255	-4.388116778	11.73991992	6	6	No error
288	44.60032178	-115.1319663	6	6	No error
118	13.183333	39.549999	3	3	No error
175	40.70779029267635	-77.95410441193017	4	4	No error
273	-35.30658666	141.671538199999	6	6	No error
15	48.102222	1.299444	1	1	No error
278	64.6193	15.3879	6	6	No error
285	55.8212235499999	-112.6064831	6	6	No error
219	19.1762336046661	-70.1042025255842	5	5	No error
23	46.338490	-73.183829	1	1	No error
111	12.1	0.483333	3	3	No error
9	47.590389	19.331944	1	1	No error
212	-31.4406609891585	-52.8542309515209	5	5	No error
38	33.895583	-4.673943	1	1	No error
231	13.9523966778338	107.249996179895	5	5	No error
186	32.984379	35.565368	4	4	No error
211	-43.2065216316647	172.69534536665	5	5	No error
224	47.2426899234225	-0.0458355421625186	5	5	No error
183	43.5487720953597	13.3646199004946	4	4	No error
116	44.591072	-73.895447	3	3	No error
99	53.0400152299562	-3.70998434299617	2	2	No error
188	32.7798733328526	35.7569877158322	4	4	No error
234	45.4521509296132	11.749964119154	5	5	No error
184	37.913055	-7.953195	4	4	No error
10	37.958611	-0.938056	1	1	No error
250	27.9525326108597	68.750053642064	5	5	No error
104	13.772321	-15.993486	3	3	No error
43	-2.348333	-48.262222	1	1	No error
199	-25.1227476047307	152.123621893362	4	4	No error
34	3.397500046352276	101.2063047720452	1	1	No error
190	24.416824	46.574928	4	4	No error
198	-25.0962926548053	152.334424894043	4	4	No error
16	51.78960040466635	14.632735333218283	1	1	No error
230	26.4522486945767	77.7499531946969	5	5	No error
162	14.788752	-17.227163	4	4	No error
28	1.180657	34.299416	1	1	No error
46	47.346416	8.761666	1	1	No error
154	14.826335	-17.10166	4	4	No error
173	38.112377	-3.16324	4	4	No error
109	32.050359	-6.568774	3	3	No error
148	37.5799927763446	24.3255641769698	3	3	No error
20	43.61218401296337	3.9765024568908256	1	1	No error
197	23.2795369004329	85.4105470600493	4	4	No error
189	32.854476	35.698701	4	4	No error
133	35.1079576816121	-6.12255752548951	3	3	No error
166	-36.422167	145.458899	4	4	No error
117	10.548560728557026	76.2676781505486	3	3	No error
180	35.4981644449096	-119.660849047785	4	4	No error
151	14.828055	-17.096666	4	4	No error
223	-40.1155553582133	175.362461435698	5	5	No error
170	-22.623802	-49.678967	4	4	No error
8	2.7779644062299687	102.91932864685018	1	1	No error
249	35.4526169438587	36.2499034385215	5	5	No error
192	33.714034	44.635779	4	1	Decision tree
149	61.9693067706063	23.549725438182	3	6	Decision tree
168	32.02140524767173	73.04407177089517	4	1	Decision tree
49	19.5486087254347	109.47496931451	1	4	Decision tree
157	14.804289	-17.209672	4	1	Decision tree
21	43.67544249713808	10.92313257621417	1	6	Decision tree
127	42.837003	-90.801608	3	6	Decision tree
155	14.798056	-17.142221	4	1	Decision tree
164	41.358612	-7.039444	4	1	Decision tree
156	14.790303	-17.228687	4	1	Decision tree
176	36.46961021406719	7.528619953153321	4	1	Decision tree
163	14.790277	-17.205	4	3	Decision tree
44	-1.941329	103.251968	1	4	Decision tree
146	32.4426608917372	-85.7324247619894	3	6	Decision tree
171	41.443531	-4.898066	4	1	Decision tree
200	33.4031045294392	35.6547929396586	4	1	Decision tree
178	37.91815	15.981421	4	1	Decision tree
165	37.510708	-5.962494	4	1	Decision tree
113	8.888889	-76.311836	3	6	Decision tree
47	5.05832252388531	-2.49706891611228	1	4	Decision tree
112	8.510305	-76.103584	3	6	Decision tree
195	32.9500011038224	129.959998248829	4	1	Decision tree
126	-10.708752	-75.257141	3	6	Decision tree
128	46.349998	-94.366669	3	6	Decision tree
174	8.95360578762234	7.693436743274174	4	1	Decision tree
150	60.1335968542932	24.6232192121456	3	6	Decision tree
153	14.994166	-16.990278	4	1	Decision tree
177	29.183775380431367	-107.4206235328462	4	1	Decision tree
142	37.1043356661566	-77.9572983272984	3	6	Decision tree
143	-25.7144616363474	-53.0761149449333	3	6	Decision tree
138	27.4369783131491	89.5120065798659	3	6	Decision tree
115	8.184964885106458	-75.53034403346331	3	6	Decision tree
152	14.983611	-17.003889	4	1	Decision tree
68	58.5283	26.9537	2	6	Interpreter's error
105	15.034711	-16.785583	3	1	Interpreter's error
50	38.08440778212971	77.16651214623651	1	5	Interpreter's error
251	-21.20006045	34.25879523	6	3	Interpreter's error
132	-54.093613	-67.681664	3	6	Interpreter's error
131	-31.724762	-55.805297	3	5	Interpreter's error
33	42.54193046547715	11.444650548117998	1	4	Interpreter's error
13	46.010834	-0.2325	1	4	Interpreter's error
172	23.498597	114.468379	4	5	Interpreter's error
181	41.6684965888115	0.456689428394522	4	5	Interpreter's error
144	32.4441309703319	-85.7333818408569	3	6	Interpreter's error
185	41.5088993001528	0.8532220897562127	4	1	Interpreter's error
122	40.644165	9.259167	3	6	Interpreter's error
238	53.2499574074016	5.95237944969087	5	1	Interpreter's error
110	12.683333	-1.566667	3	6	Interpreter's error
12	43.68227994265581	10.341805567386645	1	4	Interpreter's error
140	58.4499887466342	11.4166023256893	3	6	Interpreter's error
243	-27.8482028233127	25.9523529432793	5	3	Interpreter's error
193	33.764133	44.634036	4	6	Interpreter's error

## Sheet: Intrepreter 3 
IDCode	LAT	LON	Actual	Interpreted	Reason
286	51.8654	-66.0775	6	6	No error
258	5.702305993	-8.489022537	6	6	No error
41	37.90844814784964	23.83395797834276	1	1	No error
256	6.022500723	-8.957806412	6	6	No error
3	36.7086691700405	9.509848011078669	1	1	No error
280	68.4068933199999	32.8072143699999	6	6	No error
62	50.769630766711494	3.803457290523237	2	2	No error
161	-34.06848898575076	19.112423401638708	4	4	No error
191	-40.882903494475	-72.8374678302501	4	4	No error
232	49.4534344652502	117.25029574428	5	5	No error
64	53.185855910581786	11.956317247221055	2	2	No error
271	-20.30286662	147.630975	6	6	No error
225	45.8340509098807	0.0958312716421858	5	5	No error
75	55.767828482868985	13.607174581621063	2	2	No error
248	31.2500097862897	30.9523785034499	5	5	No error
259	52.1662900899999	141.450238799999	6	6	No error
92	14.566732	-60.974873	2	2	No error
106	14.46334811594152	-16.2984731164179	3	3	No error
275	60.05851614	34.77189998	6	6	No error
228	37.6177023033246	-5.80411110593954	5	5	No error
295	3.288639742	-76.6555903299999	6	6	No error
71	49.92882	3.83469	2	2	No error
203	49.6440055781392	33.5035794103495	5	5	No error
40	36.632269	10.279716	1	1	No error
97	48.3902578764688	18.9812340620389	2	2	No error
73	63.34641015699603	10.22642786769913	2	2	No error
297	1.23013	-77.11647433	6	6	No error
11	37.992146	23.783314	1	1	No error
244	33.250147500528	-7.348143933848496	5	5	No error
245	11.9524148873762	-15.2501476483312	5	5	No error
242	-27.7510241352835	26.4514732916214	5	5	No error
6	43.704166	3.861389	1	1	No error
298	12.08800682	99.9597116799999	6	6	No error
262	-8.306685899	115.129623699999	6	6	No error
84	53.037109	-3.712	2	2	No error
139	31.6970082737052	50.336602324946	3	3	No error
290	-0.16591311	-66.9680675	6	6	No error
237	39.4522705811589	118.250042166742	5	5	No error
91	14.657885	-60.918079	2	2	No error
292	-25.13844363	-53.7035663099999	6	6	No error
293	-7.773504054	-65.6161341699999	6	6	No error
247	32.4529966026438	20.7505793550973	5	5	No error
210	51.2277118478797	42.6525724980848	5	5	No error
79	54.00198783571939	10.437560905415348	2	2	No error
114	8.742607	-76.324613	3	3	No error
66	53.19775545358287	11.907486441226828	2	2	No error
222	15.9011726827518	105.12056649173	5	5	No error
37	34.966255	-2.502569	1	1	No error
252	-1.001794487	41.39124719	6	6	No error
86	47.98967494171678	-1.7676714261755315	2	2	No error
276	56.58926198	46.88157856	6	6	No error
179	41.668274	0.457841	4	4	No error
78	54.02643940862905	10.394076289951498	2	2	No error
253	-11.81477392	43.36391404	6	6	No error
63	53.18509	11.91086	2	2	No error
279	58.80854763	39.85598181	6	6	No error
287	50.65319773	-69.4335755099999	6	6	No error
83	53.033459	-3.747871	2	2	No error
267	12.08800682	99.9597116799999	6	6	No error
216	-32.9655631720742	-63.2626884845132	5	5	No error
215	42.0671227826636	-79.2710478785349	5	5	No error
70	49.943525958815556	3.8388689961437517	2	2	No error
268	-32.77959193	150.460782399999	6	6	No error
209	52.2001250471091	61.9158925058726	5	5	No error
36	35.010834	-2.406389	1	1	No error
72	63.37024609997477	10.085872333433707	2	2	No error
274	-30.59818945	152.424	6	6	No error
141	41.21668281228	-6.40003218832321	3	3	No error
187	33.026064	35.582158	4	4	No error
227	36.2177022216284	5.78748043103657	5	5	No error
77	55.801733843529	13.605619524959149	2	2	No error
236	32.9530651846701	-110.749957086671	5	5	No error
58	51.49282026888746	9.9098317806673	2	2	No error
201	51.0092333622998	6.31251072725553	5	5	No error
67	58.52810955588557	26.888985717525262	2	2	No error
299	63.3345311499999	96.4761491999999	6	6	No error
300	-2.710100377	116.269497099999	6	6	No error
88	48.13993357915797	-3.6133280002615207	2	2	No error
26	5.273170	-3.831467	1	1	No error
291	-25.1319979899999	-48.6348115999999	6	6	No error
101	14.268847	-16.21689	3	3	No error
22	38.464802	38.358646	1	1	No error
264	60.8865278299999	132.972276999999	6	6	No error
226	43.3432081424584	0.10386629080584	5	5	No error
48	42.809592	12.661176	1	1	No error
134	14.6999584751664	-16.4835478790162	3	3	No error
87	18.752739	82.7008	2	2	No error
284	62.67031541	-112.658570999999	6	6	No error
220	-34.6734838324052	138.620349329075	5	5	No error
81	53.97620292186878	10.531712929413086	2	2	No error
32	34.051821186419204	-5.087481105790628	1	1	No error
82	-30.399438743001884	29.398361014304466	2	2	No error
137	37.2425257414588	-6.3270009726102	3	3	No error
93	14.720639	-60.995834	2	2	No error
98	18.752813524518814	82.70098684675294	2	2	No error
7	36.09103272806777	-94.19001395311489	1	1	No error
218	-37.0889363032622	-59.2799511226309	5	5	No error
107	13.948215273679377	-16.0621789683836	3	3	No error
296	-1.335	-62.5242	6	6	No error
270	-28.00131901	152.317787799999	6	6	No error
233	20.6518864067181	77.5506940007883	5	5	No error
61	50.977627868727055	3.7573715668778087	2	2	No error
265	32.32573046	69.7702541099999	6	6	No error
35	38.349980	22.200035	1	1	No error
241	54.4516574951856	74.7487499108088	5	5	No error
159	-32.94867775558334	19.208296159493095	4	4	No error
257	-15.14865279	19.757	6	6	No error
29	45.14211852330132	11.503775721077291	1	1	No error
19	23.272148	85.347221	1	1	No error
213	41.8842640351293	-5.33734161526936	5	5	No error
289	10.0885	-83.96733147	6	6	No error
239	44.4525188256091	19.9524881866264	5	5	No error
221	-30.5211078608582	116.960034494869	5	5	No error
60	50.914074427459745	3.7565180347858673	2	2	No error
260	1.937893562	104.094837699999	6	6	No error
204	50.0089502480585	27.2453879537744	5	5	No error
14	46.198334	-0.176944	1	1	No error
147	38.6077932040065	21.2156105385364	3	3	No error
124	13.316667	30.166666	3	3	No error
136	12.0800419531971	-1.56662378698618	3	3	No error
94	46.75735080370743	16.35524920883918	2	2	No error
217	51.2658896134419	35.0584054535383	5	5	No error
160	-33.366657683051734	19.32420703257895	4	4	No error
214	17.3012288727539	81.0791556022562	5	5	No error
74	63.498139180069515	9.798302890963093	2	2	No error
57	51.68348626659701	-1.8993562729494038	2	2	No error
89	47.010551149722524	-0.7475334387811696	2	2	No error
42	33.953213	-5.531949	1	1	No error
39	33.9302927332058	-5.27464831864597	1	1	No error
281	61.8345042099999	58.72532438	6	6	No error
90	14.691082	-61.007736	2	2	No error
205	41.8600346625196	-96.6207697547647	5	5	No error
145	-21.5506585836303	-43.0997854275172	3	3	No error
103	14.711522	-16.569209	3	3	No error
31	36.107022	110.593902	1	1	No error
45	19.022005028170632	-102.26426151114724	1	1	No error
123	13.266666	30.483334	3	3	No error
30	40.111084090438595	23.342216676316202	1	1	No error
282	64.42732723	38.79341308	6	6	No error
240	54.4523525742887	30.7501017094844	5	5	No error
121	38.379064	-4.757308	3	3	No error
266	4.839986897	115.1708667	6	6	No error
229	44.5760023768834	5.829094855088	5	5	No error
108	31.995559	-6.519025	3	3	No error
246	38.651819486776	27.95232735394	5	5	No error
235	-30.0476238189097	-51.7500094164733	5	5	No error
261	-0.841213341	109.5150608	6	6	No error
272	-20.6775314299999	148.270957199999	6	6	No error
254	4.538665213	-7.13224	6	6	No error
283	65.5624328499999	-148.576072799999	6	6	No error
59	50.92851187199253	3.74146926864259	2	2	No error
294	-42.80087539	-74.0954243399999	6	6	No error
76	55.782439420159	13.647891030628605	2	2	No error
263	-3.207790762	113.7239517	6	6	No error
18	45.30656281218369	18.439042708798166	1	1	No error
95	54.732922121167995	-5.854950610656353	2	2	No error
25	-20.9164531809137	-44.8538677139821	1	1	No error
102	14.787437	-16.63992	3	3	No error
206	53.5507484852754	-109.069944726948	5	5	No error
269	-14.4476870099999	135.5456823	6	6	No error
96	54.9523944675765	-5.96757343236372	2	2	No error
277	67.00849241	39.22338958	6	6	No error
207	17.459229569448	103.137379111002	5	5	No error
80	53.997042037211784	10.538243848195426	2	2	No error
255	-4.388116778	11.73991992	6	6	No error
208	-41.8650950055731	147.054234315551	5	5	No error
140	58.4499887466342	11.4166023256893	3	3	No error
175	40.70779029267635	-77.95410441193017	4	4	No error
149	61.9693067706063	23.549725438182	3	3	No error
273	-35.30658666	141.671538199999	6	6	No error
69	58.6063	27.12124	2	2	No error
68	58.5283	26.9537	2	2	No error
105	15.034711	-16.785583	3	3	No error
211	-43.2065216316647	172.69534536665	5	5	No error
224	47.2426899234225	-0.0458355421625186	5	5	No error
132	-54.093613	-67.681664	3	3	No error
99	53.0400152299562	-3.70998434299617	2	2	No error
234	45.4521509296132	11.749964119154	5	5	No error
169	-15.066675	-43.800009	4	4	No error
174	8.95360578762234	7.693436743274174	4	4	No error
190	24.416824	46.574928	4	4	No error
198	-25.0962926548053	152.334424894043	4	4	No error
154	14.826335	-17.10166	4	4	No error
173	38.112377	-3.16324	4	4	No error
172	23.498597	114.468379	4	4	No error
109	32.050359	-6.568774	3	3	No error
181	41.6684965888115	0.456689428394522	4	4	No error
197	23.2795369004329	85.4105470600493	4	4	No error
189	32.854476	35.698701	4	4	No error
166	-36.422167	145.458899	4	4	No error
185	41.5088993001528	0.8532220897562127	4	4	No error
100	47.995137	-1.765256	2	2	No error
180	35.4981644449096	-119.660849047785	4	4	No error
151	14.828055	-17.096666	4	4	No error
51	0.186462	34.741375	2	2	No error
170	-22.623802	-49.678967	4	4	No error
249	35.4526169438587	36.2499034385215	5	5	No error
238	53.2499574074016	5.95237944969087	5	5	No error
127	42.837003	-90.801608	3	6	Decision tree
155	14.798056	-17.142221	4	1	Decision tree
164	41.358612	-7.039444	4	1	Decision tree
156	14.790303	-17.228687	4	1	Decision tree
183	43.5487720953597	13.3646199004946	4	1	Decision tree
176	36.46961021406719	7.528619953153321	4	1	Decision tree
163	14.790277	-17.205	4	3	Decision tree
44	-1.941329	103.251968	1	4	Decision tree
146	32.4426608917372	-85.7324247619894	3	6	Decision tree
171	41.443531	-4.898066	4	1	Decision tree
200	33.4031045294392	35.6547929396586	4	1	Decision tree
178	37.91815	15.981421	4	1	Decision tree
165	37.510708	-5.962494	4	1	Decision tree
113	8.888889	-76.311836	3	6	Decision tree
1	26.093292455014577	32.479788106150046	1	5	Decision tree
47	5.05832252388531	-2.49706891611228	1	4	Decision tree
112	8.510305	-76.103584	3	6	Decision tree
195	32.9500011038224	129.959998248829	4	1	Decision tree
126	-10.708752	-75.257141	3	6	Decision tree
128	46.349998	-94.366669	3	6	Decision tree
150	60.1335968542932	24.6232192121456	3	6	Decision tree
153	14.994166	-16.990278	4	1	Decision tree
177	29.183775380431367	-107.4206235328462	4	1	Decision tree
196	43.1512136558088	141.96580362202	4	1	Decision tree
85	47.395226	19.147882	2	1	Decision tree
5	46.681164	19.550394	1	3	Decision tree
142	37.1043356661566	-77.9572983272984	3	4	Decision tree
143	-25.7144616363474	-53.0761149449333	3	6	Decision tree
138	27.4369783131491	89.5120065798659	3	6	Decision tree
115	8.184964885106458	-75.53034403346331	3	6	Decision tree
152	14.983611	-17.003889	4	1	Decision tree
168	32.02140524767173	73.04407177089517	4	1	Decision tree
278	64.6193	15.3879	6	3	Decision tree
49	19.5486087254347	109.47496931451	1	4	Decision tree
186	32.984379	35.565368	4	1	Interpreter's error
50	38.08440778212971	77.16651214623651	1	5	Interpreter's error
116	44.591072	-73.895447	3	6	Interpreter's error
251	-21.20006045	34.25879523	6	3	Interpreter's error
188	32.7798733328526	35.7569877158322	4	1	Interpreter's error
184	37.913055	-7.953195	4	5	Interpreter's error
10	37.958611	-0.938056	1	4	Interpreter's error
250	27.9525326108597	68.750053642064	5	2	Interpreter's error
131	-31.724762	-55.805297	3	5	Interpreter's error
104	13.772321	-15.993486	3	5	Interpreter's error
43	-2.348333	-48.262222	1	4	Interpreter's error
34	3.397500046352276	101.2063047720452	1	4	Interpreter's error
33	42.54193046547715	11.444650548117998	1	4	Interpreter's error
230	26.4522486945767	77.7499531946969	5	2	Interpreter's error
162	14.788752	-17.227163	4	1	Interpreter's error
28	1.180657	34.299416	1	3	Interpreter's error
46	47.346416	8.761666	1	2	Interpreter's error
13	46.010834	-0.2325	1	4	Interpreter's error
148	37.5799927763446	24.3255641769698	3	1	Interpreter's error
144	32.4441309703319	-85.7333818408569	3	6	Interpreter's error
133	35.1079576816121	-6.12255752548951	3	6	Interpreter's error
223	-40.1155553582133	175.362461435698	5	3	Interpreter's error
122	40.644165	9.259167	3	6	Interpreter's error
8	2.7779644062299687	102.91932864685018	1	4	Interpreter's error
12	43.68227994265581	10.341805567386645	1	4	Interpreter's error
118	13.183333	39.549999	3	2	Interpreter's error
168	32.02140524767173	73.04407177089517	4	1	Decision tree
15	48.102222	1.299444	1	2	Interpreter's error
278	64.6193	15.3879	6	3	Decision tree
49	19.5486087254347	109.47496931451	1	4	Decision tree
231	13.9523966778338	107.249996179895	5	6	Interpreter's error

## Sheet: Intrepreter 4 
IDCode	LAT	LON	Actual	Interpreted	Reason
286	51.8654	-66.0775	6	6	No error
258	5.702305993	-8.489022537	6	6	No error
41	37.90844814784964	23.83395797834276	1	1	No error
256	6.022500723	-8.957806412	6	6	No error
3	36.7086691700405	9.509848011078669	1	1	No error
280	68.4068933199999	32.8072143699999	6	6	No error
62	50.769630766711494	3.803457290523237	2	2	No error
161	-34.06848898575076	19.112423401638708	4	4	No error
191	-40.882903494475	-72.8374678302501	4	4	No error
232	49.4534344652502	117.25029574428	5	5	No error
64	53.185855910581786	11.956317247221055	2	2	No error
271	-20.30286662	147.630975	6	6	No error
225	45.8340509098807	0.0958312716421858	5	5	No error
75	55.767828482868985	13.607174581621063	2	2	No error
248	31.2500097862897	30.9523785034499	5	5	No error
259	52.1662900899999	141.450238799999	6	6	No error
92	14.566732	-60.974873	2	2	No error
106	14.46334811594152	-16.2984731164179	3	3	No error
275	60.05851614	34.77189998	6	6	No error
228	37.6177023033246	-5.80411110593954	5	5	No error
295	3.288639742	-76.6555903299999	6	6	No error
71	49.92882	3.83469	2	2	No error
203	49.6440055781392	33.5035794103495	5	5	No error
40	36.632269	10.279716	1	1	No error
97	48.3902578764688	18.9812340620389	2	2	No error
73	63.34641015699603	10.22642786769913	2	2	No error
297	1.23013	-77.11647433	6	6	No error
11	37.992146	23.783314	1	1	No error
244	33.250147500528	-7.348143933848496	5	5	No error
245	11.9524148873762	-15.2501476483312	5	5	No error
242	-27.7510241352835	26.4514732916214	5	5	No error
6	43.704166	3.861389	1	1	No error
298	12.08800682	99.9597116799999	6	6	No error
262	-8.306685899	115.129623699999	6	6	No error
84	53.037109	-3.712	2	2	No error
139	31.6970082737052	50.336602324946	3	3	No error
290	-0.16591311	-66.9680675	6	6	No error
237	39.4522705811589	118.250042166742	5	5	No error
91	14.657885	-60.918079	2	2	No error
292	-25.13844363	-53.7035663099999	6	6	No error
293	-7.773504054	-65.6161341699999	6	6	No error
247	32.4529966026438	20.7505793550973	5	5	No error
210	51.2277118478797	42.6525724980848	5	5	No error
79	54.00198783571939	10.437560905415348	2	2	No error
114	8.742607	-76.324613	3	3	No error
66	53.19775545358287	11.907486441226828	2	2	No error
222	15.9011726827518	105.12056649173	5	5	No error
37	34.966255	-2.502569	1	1	No error
252	-1.001794487	41.39124719	6	6	No error
86	47.98967494171678	-1.7676714261755315	2	2	No error
276	56.58926198	46.88157856	6	6	No error
179	41.668274	0.457841	4	4	No error
78	54.02643940862905	10.394076289951498	2	2	No error
253	-11.81477392	43.36391404	6	6	No error
63	53.18509	11.91086	2	2	No error
279	58.80854763	39.85598181	6	6	No error
287	50.65319773	-69.4335755099999	6	6	No error
83	53.033459	-3.747871	2	2	No error
267	12.08800682	99.9597116799999	6	6	No error
216	-32.9655631720742	-63.2626884845132	5	5	No error
215	42.0671227826636	-79.2710478785349	5	5	No error
70	49.943525958815556	3.8388689961437517	2	2	No error
268	-32.77959193	150.460782399999	6	6	No error
209	52.2001250471091	61.9158925058726	5	5	No error
36	35.010834	-2.406389	1	1	No error
72	63.37024609997477	10.085872333433707	2	2	No error
274	-30.59818945	152.424	6	6	No error
141	41.21668281228	-6.40003218832321	3	3	No error
187	33.026064	35.582158	4	4	No error
227	36.2177022216284	5.78748043103657	5	5	No error
77	55.801733843529	13.605619524959149	2	2	No error
236	32.9530651846701	-110.749957086671	5	5	No error
58	51.49282026888746	9.9098317806673	2	2	No error
201	51.0092333622998	6.31251072725553	5	5	No error
67	58.52810955588557	26.888985717525262	2	2	No error
299	63.3345311499999	96.4761491999999	6	6	No error
300	-2.710100377	116.269497099999	6	6	No error
88	48.13993357915797	-3.6133280002615207	2	2	No error
26	5.273170	-3.831467	1	1	No error
291	-25.1319979899999	-48.6348115999999	6	6	No error
101	14.268847	-16.21689	3	3	No error
22	38.464802	38.358646	1	1	No error
264	60.8865278299999	132.972276999999	6	6	No error
226	43.3432081424584	0.10386629080584	5	5	No error
48	42.809592	12.661176	1	1	No error
134	14.6999584751664	-16.4835478790162	3	3	No error
87	18.752739	82.7008	2	2	No error
284	62.67031541	-112.658570999999	6	6	No error
220	-34.6734838324052	138.620349329075	5	5	No error
81	53.97620292186878	10.531712929413086	2	2	No error
32	34.051821186419204	-5.087481105790628	1	1	No error
82	-30.399438743001884	29.398361014304466	2	2	No error
137	37.2425257414588	-6.3270009726102	3	3	No error
93	14.720639	-60.995834	2	2	No error
98	18.752813524518814	82.70098684675294	2	2	No error
7	36.09103272806777	-94.19001395311489	1	1	No error
218	-37.0889363032622	-59.2799511226309	5	5	No error
107	13.948215273679377	-16.0621789683836	3	3	No error
296	-1.335	-62.5242	6	6	No error
270	-28.00131901	152.317787799999	6	6	No error
233	20.6518864067181	77.5506940007883	5	5	No error
61	50.977627868727055	3.7573715668778087	2	2	No error
265	32.32573046	69.7702541099999	6	6	No error
35	38.349980	22.200035	1	1	No error
241	54.4516574951856	74.7487499108088	5	5	No error
159	-32.94867775558334	19.208296159493095	4	4	No error
257	-15.14865279	19.757	6	6	No error
29	45.14211852330132	11.503775721077291	1	1	No error
19	23.272148	85.347221	1	1	No error
213	41.8842640351293	-5.33734161526936	5	5	No error
289	10.0885	-83.96733147	6	6	No error
239	44.4525188256091	19.9524881866264	5	5	No error
221	-30.5211078608582	116.960034494869	5	5	No error
60	50.914074427459745	3.7565180347858673	2	2	No error
260	1.937893562	104.094837699999	6	6	No error
204	50.0089502480585	27.2453879537744	5	5	No error
14	46.198334	-0.176944	1	1	No error
147	38.6077932040065	21.2156105385364	3	3	No error
124	13.316667	30.166666	3	3	No error
136	12.0800419531971	-1.56662378698618	3	3	No error
94	46.75735080370743	16.35524920883918	2	2	No error
217	51.2658896134419	35.0584054535383	5	5	No error
160	-33.366657683051734	19.32420703257895	4	4	No error
214	17.3012288727539	81.0791556022562	5	5	No error
74	63.498139180069515	9.798302890963093	2	2	No error
57	51.68348626659701	-1.8993562729494038	2	2	No error
89	47.010551149722524	-0.7475334387811696	2	2	No error
42	33.953213	-5.531949	1	1	No error
39	33.9302927332058	-5.27464831864597	1	1	No error
281	61.8345042099999	58.72532438	6	6	No error
90	14.691082	-61.007736	2	2	No error
205	41.8600346625196	-96.6207697547647	5	5	No error
145	-21.5506585836303	-43.0997854275172	3	3	No error
103	14.711522	-16.569209	3	3	No error
31	36.107022	110.593902	1	1	No error
45	19.022005028170632	-102.26426151114724	1	1	No error
123	13.266666	30.483334	3	3	No error
30	40.111084090438595	23.342216676316202	1	1	No error
282	64.42732723	38.79341308	6	6	No error
240	54.4523525742887	30.7501017094844	5	5	No error
121	38.379064	-4.757308	3	3	No error
266	4.839986897	115.1708667	6	6	No error
229	44.5760023768834	5.829094855088	5	5	No error
108	31.995559	-6.519025	3	3	No error
246	38.651819486776	27.95232735394	5	5	No error
235	-30.0476238189097	-51.7500094164733	5	5	No error
261	-0.841213341	109.5150608	6	6	No error
272	-20.6775314299999	148.270957199999	6	6	No error
254	4.538665213	-7.13224	6	6	No error
283	65.5624328499999	-148.576072799999	6	6	No error
59	50.92851187199253	3.74146926864259	2	2	No error
294	-42.80087539	-74.0954243399999	6	6	No error
76	55.782439420159	13.647891030628605	2	2	No error
263	-3.207790762	113.7239517	6	6	No error
18	45.30656281218369	18.439042708798166	1	1	No error
95	54.732922121167995	-5.854950610656353	2	2	No error
25	-20.9164531809137	-44.8538677139821	1	1	No error
102	14.787437	-16.63992	3	3	No error
206	53.5507484852754	-109.069944726948	5	5	No error
269	-14.4476870099999	135.5456823	6	6	No error
96	54.9523944675765	-5.96757343236372	2	2	No error
277	67.00849241	39.22338958	6	6	No error
207	17.459229569448	103.137379111002	5	5	No error
80	53.997042037211784	10.538243848195426	2	2	No error
255	-4.388116778	11.73991992	6	6	No error
202	43.02673539948	-95.0380002411782	5	5	No error
120	14.033334	39.066666	3	3	No error
208	-41.8650950055731	147.054234315551	5	5	No error
285	55.8212235499999	-112.6064831	6	6	No error
243	-27.8482028233127	25.9523529432793	5	5	No error
219	19.1762336046661	-70.1042025255842	5	5	No error
23	46.338490	-73.183829	1	1	No error
111	12.1	0.483333	3	3	No error
193	33.764133	44.634036	4	4	No error
21	43.67544249713808	10.92313257621417	1	1	No error
212	-31.4406609891585	-52.8542309515209	5	5	No error
38	33.895583	-4.673943	1	1	No error
186	32.984379	35.565368	4	4	No error
68	58.5283	26.9537	2	2	No error
211	-43.2065216316647	172.69534536665	5	5	No error
183	43.5487720953597	13.3646199004946	4	4	No error
52	0.435786	34.856698	2	2	No error
251	-21.20006045	34.25879523	6	6	No error
132	-54.093613	-67.681664	3	3	No error
184	37.913055	-7.953195	4	4	No error
10	37.958611	-0.938056	1	1	No error
250	27.9525326108597	68.750053642064	5	5	No error
104	13.772321	-15.993486	3	3	No error
194	-7.789276	112.530396	4	4	No error
34	3.397500046352276	101.2063047720452	1	1	No error
198	-25.0962926548053	152.334424894043	4	4	No error
33	42.54193046547715	11.444650548117998	1	1	No error
46	47.346416	8.761666	1	1	No error
182	42.5159729128231	70.4928210860305	4	4	No error
154	14.826335	-17.10166	4	4	No error
13	46.010834	-0.2325	1	1	No error
148	37.5799927763446	24.3255641769698	3	3	No error
181	41.6684965888115	0.456689428394522	4	4	No error
20	43.61218401296337	3.9765024568908256	1	1	No error
144	32.4441309703319	-85.7333818408569	3	3	No error
133	35.1079576816121	-6.12255752548951	3	3	No error
166	-36.422167	145.458899	4	4	No error
100	47.995137	-1.765256	2	2	No error
180	35.4981644449096	-119.660849047785	4	4	No error
151	14.828055	-17.096666	4	4	No error
51	0.186462	34.741375	2	2	No error
223	-40.1155553582133	175.362461435698	5	5	No error
142	37.1043356661566	-77.9572983272984	3	3	No error
170	-22.623802	-49.678967	4	4	No error
8	2.7779644062299687	102.91932864685018	1	1	No error
238	53.2499574074016	5.95237944969087	5	5	No error
157	14.804289	-17.209672	4	1	Decision tree
127	42.837003	-90.801608	3	6	Decision tree
155	14.798056	-17.142221	4	1	Decision tree
164	41.358612	-7.039444	4	1	Decision tree
156	14.790303	-17.228687	4	1	Decision tree
176	36.46961021406719	7.528619953153321	4	1	Decision tree
163	14.790277	-17.205	4	3	Decision tree
44	-1.941329	103.251968	1	4	Decision tree
146	32.4426608917372	-85.7324247619894	3	6	Decision tree
171	41.443531	-4.898066	4	1	Decision tree
200	33.4031045294392	35.6547929396586	4	1	Decision tree
178	37.91815	15.981421	4	1	Decision tree
165	37.510708	-5.962494	4	1	Decision tree
113	8.888889	-76.311836	3	6	Decision tree
1	26.093292455014577	32.479788106150046	1	3	Decision tree
47	5.05832252388531	-2.49706891611228	1	4	Decision tree
112	8.510305	-76.103584	3	6	Decision tree
195	32.9500011038224	129.959998248829	4	1	Decision tree
126	-10.708752	-75.257141	3	6	Decision tree
128	46.349998	-94.366669	3	6	Decision tree
174	8.95360578762234	7.693436743274174	4	1	Decision tree
190	24.416824	46.574928	4	1	Decision tree
150	60.1335968542932	24.6232192121456	3	6	Decision tree
153	14.994166	-16.990278	4	1	Decision tree
177	29.183775380431367	-107.4206235328462	4	1	Decision tree
196	43.1512136558088	141.96580362202	4	1	Decision tree
85	47.395226	19.147882	2	1	Decision tree
173	38.112377	-3.16324	4	1	Decision tree
5	46.681164	19.550394	1	3	Decision tree
143	-25.7144616363474	-53.0761149449333	3	6	Decision tree
138	27.4369783131491	89.5120065798659	3	6	Decision tree
115	8.184964885106458	-75.53034403346331	3	6	Decision tree
152	14.983611	-17.003889	4	1	Decision tree
105	15.034711	-16.785583	3	1	Interpreter's error
50	38.08440778212971	77.16651214623651	1	4	Interpreter's error
224	47.2426899234225	-0.0458355421625186	5	4	Interpreter's error
116	44.591072	-73.895447	3	6	Interpreter's error
99	53.0400152299562	-3.70998434299617	2	3	Interpreter's error
188	32.7798733328526	35.7569877158322	4	1	Interpreter's error
234	45.4521509296132	11.749964119154	5	2	Interpreter's error
131	-31.724762	-55.805297	3	5	Interpreter's error
43	-2.348333	-48.262222	1	4	Interpreter's error
230	26.4522486945767	77.7499531946969	5	2	Interpreter's error
162	14.788752	-17.227163	4	1	Interpreter's error
28	1.180657	34.299416	1	3	Interpreter's error
172	23.498597	114.468379	4	5	Interpreter's error
109	32.050359	-6.568774	3	6	Interpreter's error
189	32.854476	35.698701	4	1	Interpreter's error
185	41.5088993001528	0.8532220897562127	4	1	Interpreter's error
122	40.644165	9.259167	3	1	Interpreter's error
249	35.4526169438587	36.2499034385215	5	6	Interpreter's error
9	47.590389	19.331944	1	4	Interpreter's error
231	13.9523966778338	107.249996179895	5	6	Interpreter's error

## Sheet: Interpreter 5
IDCode	lat	lon	Actual	Interpreted	Reason
3	36.70866917	9.509848011	1	1	No error
6	43.704166	3.861389	1	1	No error
7	36.09103273	-94.19001395	1	1	No error
9	47.590389	19.331944	1	1	No error
11	37.992146	23.783314	1	1	No error
14	46.198334	-0.176944	1	1	No error
19	23.272148	85.347221	1	1	No error
20	43.61218401	3.976502457	1	1	No error
21	43.6754425	10.92313258	1	1	No error
22	38.464802	38.358646	1	1	No error
23	46.33849	-73.183829	1	1	No error
25	-20.91645318	-44.85386771	1	1	No error
26	5.27317	-3.831467	1	1	No error
28	1.180657	34.299416	1	1	No error
29	45.14211852	11.50377572	1	1	No error
30	40.11108409	23.34221668	1	1	No error
32	34.05182119	-5.087481106	1	1	No error
34	3.397500046	101.2063048	1	1	No error
35	38.34998	22.200035	1	1	No error
36	35.010834	-2.406389	1	1	No error
37	34.966255	-2.502569	1	1	No error
38	33.895583	-4.673943	1	1	No error
39	33.93029273	-5.274648319	1	1	No error
40	36.632269	10.279716	1	1	No error
41	37.90844815	23.83395798	1	1	No error
42	33.953213	-5.531949	1	1	No error
44	-1.941329	103.251968	1	1	No error
45	19.02200503	-102.2642615	1	1	No error
50	38.08440778	77.16651215	1	1	No error
51	0.186462	34.741375	2	2	No error
52	0.435786	34.856698	2	2	No error
53	-29.45116044	30.54222573	2	2	No error
57	51.68348627	-1.899356273	2	2	No error
58	51.49282027	9.909831781	2	2	No error
59	50.92851187	3.741469269	2	2	No error
60	50.91407443	3.756518035	2	2	No error
61	50.97762787	3.757371567	2	2	No error
62	50.76963077	3.803457291	2	2	No error
63	53.18509	11.91086	2	2	No error
64	53.18585591	11.95631725	2	2	No error
66	53.19775545	11.90748644	2	2	No error
67	58.52810956	26.88898572	2	2	No error
70	49.94352596	3.838868996	2	2	No error
71	49.92882	3.83469	2	2	No error
72	63.3702461	10.08587233	2	2	No error
73	63.34641016	10.22642787	2	2	No error
74	63.49813918	9.798302891	2	2	No error
75	55.76782848	13.60717458	2	2	No error
76	55.78243942	13.64789103	2	2	No error
77	55.80173384	13.60561952	2	2	No error
78	54.02643941	10.39407629	2	2	No error
79	54.00198784	10.43756091	2	2	No error
80	53.99704204	10.53824385	2	2	No error
81	53.97620292	10.53171293	2	2	No error
82	-30.39943874	29.39836101	2	2	No error
83	53.033459	-3.747871	2	2	No error
84	53.037109	-3.712	2	2	No error
85	47.395226	19.147882	2	2	No error
86	47.98967494	-1.767671426	2	2	No error
87	18.752739	82.7008	2	2	No error
88	48.13993358	-3.613328	2	2	No error
89	47.01055115	-0.747533439	2	2	No error
90	14.691082	-61.007736	2	2	No error
91	14.657885	-60.918079	2	2	No error
92	14.566732	-60.974873	2	2	No error
93	14.720639	-60.995834	2	2	No error
94	46.7573508	16.35524921	2	2	No error
95	54.73292212	-5.854950611	2	2	No error
96	54.95239447	-5.967573432	2	2	No error
97	48.39025788	18.98123406	2	2	No error
98	18.75281352	82.70098685	2	2	No error
99	53.04001523	-3.709984343	2	2	No error
100	47.995137	-1.765256	2	2	No error
101	14.268847	-16.21689	3	3	No error
102	14.787437	-16.63992	3	3	No error
103	14.711522	-16.569209	3	3	No error
104	13.772321	-15.993486	3	3	No error
106	14.46334812	-16.29847312	3	3	No error
107	13.94821527	-16.06217897	3	3	No error
108	31.995559	-6.519025	3	3	No error
109	32.050359	-6.568774	3	3	No error
110	12.683333	-1.566667	3	3	No error
111	12.1	0.483333	3	3	No error
114	8.742607	-76.324613	3	3	No error
116	44.591072	-73.895447	3	3	No error
118	13.183333	39.549999	3	3	No error
119	13.633333	39.166668	3	3	No error
120	14.033334	39.066666	3	3	No error
121	38.379064	-4.757308	3	3	No error
123	13.266666	30.483334	3	3	No error
124	13.316667	30.166666	3	3	No error
130	-32.377773	-58.063906	3	3	No error
133	35.10795768	-6.122557525	3	3	No error
134	14.69995848	-16.48354788	3	3	No error
135	10.49998479	2.500002285	3	3	No error
136	12.08004195	-1.566623787	3	3	No error
137	37.24252574	-6.327000973	3	3	No error
139	31.69700827	50.33660232	3	3	No error
145	-21.55065858	-43.09978543	3	3	No error
147	38.6077932	21.21561054	3	3	No error
151	14.828055	-17.096666	4	4	No error
154	14.826335	-17.10166	4	4	No error
159	-32.94867776	19.20829616	4	4	No error
160	-33.36665768	19.32420703	4	4	No error
161	-34.06848899	19.1124234	4	4	No error
166	-36.422167	145.458899	4	4	No error
167	-42.996077	147.056947	4	4	No error
170	-22.623802	-49.678967	4	4	No error
173	38.112377	-3.16324	4	4	No error
174	8.953605788	7.693436743	4	4	No error
180	35.49816444	-119.660849	4	4	No error
181	41.66849659	0.456689428	4	4	No error
182	42.51597291	70.49282109	4	4	No error
183	43.5487721	13.3646199	4	4	No error
184	37.913055	-7.953195	4	4	No error
185	41.5088993	0.85322209	4	4	No error
186	32.984379	35.565368	4	4	No error
187	33.026064	35.582158	4	4	No error
189	32.854476	35.698701	4	4	No error
190	24.416824	46.574928	4	4	No error
194	-7.789276	112.530396	4	4	No error
197	23.2795369	85.41054706	4	4	No error
198	-25.09629265	152.3344249	4	4	No error
199	-25.1227476	152.1236219	4	4	No error
201	51.00923336	6.312510727	5	5	No error
204	50.00895025	27.24538795	5	5	No error
205	41.86003466	-96.62076975	5	5	No error
206	53.55074849	-109.0699447	5	5	No error
208	-41.86509501	147.0542343	5	5	No error
209	52.20012505	61.91589251	5	5	No error
210	51.22771185	42.6525725	5	5	No error
212	-31.44066099	-52.85423095	5	5	No error
213	41.88426404	-5.337341615	5	5	No error
215	42.06712278	-79.27104788	5	5	No error
216	-32.96556317	-63.26268848	5	5	No error
217	51.26588961	35.05840545	5	5	No error
218	-37.0889363	-59.27995112	5	5	No error
220	-34.67348383	138.6203493	5	5	No error
221	-30.52110786	116.9600345	5	5	No error
222	15.90117268	105.1205665	5	5	No error
223	-40.11555536	175.3624614	5	5	No error
226	43.34320814	0.103866291	5	5	No error
228	37.6177023	-5.804111106	5	5	No error
233	20.65188641	77.550694	5	5	No error
235	-30.04762382	-51.75000942	5	5	No error
237	39.45227058	118.2500422	5	5	No error
238	53.24995741	5.95237945	5	5	No error
239	44.45251883	19.95248819	5	5	No error
240	54.45235257	30.75010171	5	5	No error
241	54.4516575	74.74874991	5	5	No error
242	-27.75102414	26.45147329	5	5	No error
243	-27.84820282	25.95235294	5	5	No error
244	33.2501475	-7.348143934	5	5	No error
246	38.65181949	27.95232735	5	5	No error
247	32.4529966	20.75057936	5	5	No error
248	31.25000979	30.9523785	5	5	No error
249	35.45261694	36.24990344	5	5	No error
251	-21.20006045	34.25879523	6	6	No error
252	-1.001794487	41.39124719	6	6	No error
253	-11.81477392	43.36391404	6	6	No error
254	4.538665213	-7.13224	6	6	No error
255	-4.388116778	11.73991992	6	6	No error
256	6.022500723	-8.957806412	6	6	No error
257	-15.14865279	19.757	6	6	No error
258	5.702305993	-8.489022537	6	6	No error
259	52.16629009	141.4502388	6	6	No error
260	1.937893562	104.0948377	6	6	No error
261	-0.841213341	109.5150608	6	6	No error
262	-8.306685899	115.1296237	6	6	No error
263	-3.207790762	113.7239517	6	6	No error
264	60.88652783	132.972277	6	6	No error
265	32.32573046	69.77025411	6	6	No error
266	4.839986897	115.1708667	6	6	No error
267	12.08800682	99.95971168	6	6	No error
268	-32.77959193	150.4607824	6	6	No error
269	-14.44768701	135.5456823	6	6	No error
270	-28.00131901	152.3177878	6	6	No error
271	-20.30286662	147.630975	6	6	No error
272	-20.67753143	148.2709572	6	6	No error
273	-35.30658666	141.6715382	6	6	No error
274	-30.59818945	152.424	6	6	No error
275	60.05851614	34.77189998	6	6	No error
276	56.58926198	46.88157856	6	6	No error
277	67.00849241	39.22338958	6	6	No error
278	64.6193	15.3879	6	6	No error
279	58.80854763	39.85598181	6	6	No error
280	68.40689332	32.80721437	6	6	No error
281	61.83450421	58.72532438	6	6	No error
282	64.42732723	38.79341308	6	6	No error
283	65.56243285	-148.5760728	6	6	No error
284	62.67031541	-112.658571	6	6	No error
285	55.82122355	-112.6064831	6	6	No error
286	51.8654	-66.0775	6	6	No error
287	50.65319773	-69.43357551	6	6	No error
288	44.60032178	-115.1319663	6	6	No error
289	10.0885	-83.96733147	6	6	No error
290	-0.16591311	-66.9680675	6	6	No error
291	-25.13199799	-48.6348116	6	6	No error
292	-25.13844363	-53.70356631	6	6	No error
293	-7.773504054	-65.61613417	6	6	No error
294	-42.80087539	-74.09542434	6	6	No error
295	3.288639742	-76.65559033	6	6	No error
296	-1.335	-62.5242	6	6	No error
297	1.23013	-77.11647433	6	6	No error
298	12.08800682	99.95971168	6	6	No error
300	-2.710100377	116.2694971	6	6	No error
1	26.09329246	32.47978811	1	3	Decision tree
5	46.681164	19.550394	1	3	Decision tree
12	43.68227994	10.34180557	1	4	Interpreter's error
15	48.102222	1.299444	1	4	Interpreter's error
17	51.01313567	11.64449658	1	4	Interpreter's error
18	45.30656281	18.43904271	1	4	Interpreter's error
31	36.107022	110.593902	1	4	Interpreter's error
47	5.058322524	-2.497068916	1	4	Decision tree
48	42.809592	12.661176	1	4	Interpreter's error
49	19.54860873	109.4749693	1	4	Decision tree
112	8.510305	-76.103584	3	6	Decision tree
113	8.888889	-76.311836	3	6	Decision tree
115	8.184964885	-75.53034403	3	6	Decision tree
126	-10.708752	-75.257141	3	6	Decision tree
127	42.837003	-90.801608	3	6	Decision tree
128	46.349998	-94.366669	3	4	Decision tree
138	27.43697831	89.51200658	3	6	Decision tree
140	58.44998875	11.41660233	3	2	Interpreter's error
141	41.21668281	-6.400032188	3	2	Interpreter's error
142	37.10433567	-77.95729833	3	6	Decision tree
143	-25.71446164	-53.07611494	3	6	Decision tree
146	32.44266089	-85.73242476	3	4	Decision tree
149	61.96930677	23.54972544	3	6	Decision tree
150	60.13359685	24.62321921	3	6	Decision tree
152	14.983611	-17.003889	4	1	Decision tree
153	14.994166	-16.990278	4	1	Decision tree
155	14.798056	-17.142221	4	1	Decision tree
156	14.790303	-17.228687	4	1	Decision tree
157	14.804289	-17.209672	4	1	Interpreter's error
158	14.77333	-17.108612	4	6	Interpreter's error
163	14.790277	-17.205	4	1	Decision tree
164	41.358612	-7.039444	4	1	Decision tree
165	37.510708	-5.962494	4	1	Decision tree
168	32.02140525	73.04407177	4	1	Decision tree
171	41.443531	-4.898066	4	1	Decision tree
175	40.70779029	-77.95410441	4	5	Interpreter's error
176	36.46961021	7.528619953	4	1	Decision tree
177	29.18377538	-107.4206235	4	1	Decision tree
178	37.91815	15.981421	4	1	Decision tree
179	41.668274	0.457841	4	5	Interpreter's error
191	-40.88290349	-72.83746783	4	2	Interpreter's error
192	33.714034	44.635779	4	1	Interpreter's error
193	33.764133	44.634036	4	1	Interpreter's error
195	32.9500011	129.9599982	4	1	Decision tree
196	43.15121366	141.9658036	4	1	Decision tree
200	33.40310453	35.65479294	4	1	Decision tree
202	43.0267354	-95.03800024	5	0	Interpreter's error
203	49.64400558	33.50357941	5	2	Interpreter's error
207	17.45922957	103.1373791	5	2	Interpreter's error
214	17.30122887	81.0791556	5	2	Interpreter's error
225	45.83405091	0.095831272	5	2	Interpreter's error
227	36.21770222	5.787480431	5	2	Interpreter's error
229	44.57600238	5.829094855	5	0	Interpreter's error
231	13.95239668	107.2499962	5	4	Interpreter's error
236	32.95306518	-110.7499571	5	3	Interpreter's error
245	11.95241489	-15.25014765	5	2	Interpreter's error
299	63.33453115	96.4761492	6	3	Interpreter's error
